# Supplementary material
Source: publisher figshare collection journal article supplement (https://gsajournals.figshare.com/ndownloader/files/27678705)
Supplement: Supplementary file 1 [file 27678705]

## Sheet: Total Proteins
Supplemental File S13
CA2 preliminary Brachypodium PM dataset
			NA					CA 2 days
Bradi no.	Anova (p)	Fold Change	Experiment 1	Experiment 2	Experiment 3	Experiment 4	Average	Experiment 1	Experiment 2	Experiment 3	Experiment 4	Average
Bradi5g20890.1	1.45e-05	2.96648	576543	427075	512914	462573	494776	1.29303e+06	1.68742e+06	1.40703e+06	1.4835e+06	1.46774e+06
Bradi1g11670.1	2.72e-05	0.214261	42964.7	72729.3	62903.1	73240.8	62959.5	13203.1	15336.4	12327.5	13091.9	13489.7
Bradi5g02890.1	3.74e-05	2.25687	70581.3	65760	68023.2	55457.5	64955.5	133067	154682	133848	164786	146596
Bradi5g15970.1	8.64e-05	0.377613	961138	975383	1.2495e+06	962730	1.03719e+06	419932	313556	460241	372897	391656
Bradi3g49360.1	8.71e-05	0.306114	1.60053e+06	981489	1.09713e+06	950086	1.15731e+06	361453	320243	379598	355783	354269
Bradi1g28760.1	9.14e-05	0.48339	7.16922e+06	5.63367e+06	5.1579e+06	5.4289e+06	5.84742e+06	2.90867e+06	3.00356e+06	2.67101e+06	2.72309e+06	2.82658e+06
Bradi2g45580.1	0.000138142	0.399568	622415	633090	428218	658316	585510	238566	225819	253397	218022	233951
Bradi1g29900.1	0.000180322	6.07014	11391.9	11450.8	12536	21582.9	14240.4	84536.6	53304.1	96830.5	111094	86441.4
Bradi1g31690.1	0.000205113	0.348399	136005	179519	136360	175949	156958	58295.7	62806.1	39016.3	58618.1	54684.1
Bradi1g11440.1	0.000242385	0.569795	107196	111131	117399	108963	111172	54109.5	71207	57387.7	70677.1	63345.4
Bradi1g67960.1	0.000248724	0.34039	623220	484582	347884	570885	506643	193288	166392	154138	176006	172456
Bradi2g34910.1	0.000291865	1.57737	687514	718864	822697	750590	744916	1.08861e+06	1.25601e+06	1.28384e+06	1.07156e+06	1.17501e+06
Bradi5g07080.1	0.000320585	1.97733	112507	100771	141042	116008	117582	269377	205048	240482	215087	232498
Bradi4g16640.1	0.000353459	1.41762	639920	623568	582813	631051	619338	808152	826016	975526	902238	877983
Bradi3g42030.1	0.000374359	0.20986	20147.1	36069.9	18036.9	39236.5	28372.6	4895.02	5728.55	6372.37	6821.2	5954.28
Bradi2g14400.1	0.000392715	0.402404	202307	300672	195123	283242	245336	115795	92839.5	88405.4	97856.6	98724.1
Bradi3g56020.1	0.000432085	0.516905	1.13343e+06	953557	1.36634e+06	1.00378e+06	1.11428e+06	528749	622192	525831	627130	575976
Bradi4g31330.1	0.000812467	0.241144	59843.4	34387.1	22611.1	50325.2	41791.7	9351.99	9596.48	10704.5	10658.2	10077.8
Bradi1g04860.1	0.00101057	0.465968	32277	27868	20322.9	20608.2	25269	10883.1	12919.7	10556.1	12739.3	11774.5
Bradi1g01936.1	0.00109326	1.72907	96283.5	73635.7	77621.1	69813.5	79338.4	115317	148282	151141	133988	137182
Bradi5g23660.1	0.00119249	0.424226	108675	123183	105547	170372	126944	69091.8	48609.3	43302.5	54408.6	53853.1
Bradi2g33060.1	0.00119639	0.184275	22994.4	13452.4	6847.31	15233.9	14632	2633.16	2874.44	1853.42	3424.22	2696.31
Bradi1g44630.1	0.001238	0.419133	145514	106061	80860.5	109393	110457	55623.1	36429.1	49430.3	43702.2	46296.2
Bradi1g26310.1	0.00127885	1.52741	898243	756867	759471	846153	815184	1.26419e+06	1.11003e+06	1.14924e+06	1.45701e+06	1.24512e+06
Bradi3g48590.1	0.00129305	2.22952	133307	134601	210296	107637	146460	326861	306501	308196	364583	326535
Bradi2g42100.1	0.00143643	0.512652	77704.6	63159.3	57772.7	85198.2	70958.7	43348	35805.8	36879.4	29475.1	36377.1
Bradi2g14900.1	0.001653	0.149628	25180	10888.6	5707.64	10720.5	13124.2	2609.97	2077.74	1459.08	1708.17	1963.74
Bradi2g04070.1	0.00192002	3.92139	79823	48285.4	24944.9	33692.2	46686.4	145643	167866	247620	171172	183075
Bradi3g42340.1	0.00192665	0.329133	65079.6	36111.1	46399.8	30733.8	44581.1	20262.1	14980	11984.5	11465.9	14673.1
Bradi5g19680.1	0.00202371	3.31904	3433.81	2094.19	2347.24	3274.6	2787.46	6982.34	11546.8	5826.24	12651.4	9251.69
Bradi5g16320.1	0.00207249	2.08072	22515.5	28449	32412.8	16999.1	25094.1	56201.5	51296.6	47121	54235.9	52213.8
Bradi4g37350.1	0.00225865	0.606063	516596	363978	399208	455499	433820	293299	222347	280048	255994	262922
Bradi3g50230.1	0.00239021	2.47291	24379	15934.3	17193	13216.2	17680.6	45492.5	52469.1	29475.2	47453.3	43722.5
Bradi1g39167.1	0.00247108	0.54127	78286.1	123081	96661.9	105823	100963	49845.1	64038.3	45664.8	59045.1	54648.3
Bradi2g04480.1	0.00253523	0.691628	199937	179923	150408	176238	176626	110868	116128	125910	135733	122160
Bradi1g26770.1	0.00270795	0.240035	21270.7	23441.9	10236.5	17128.2	18019.3	5462.39	2206.61	3517.07	6114.99	4325.27
Bradi3g53520.1	0.00291727	0.224906	317659	169390	85070.7	216654	197193	50870.8	49159.8	41971.8	35397.1	44349.9
Bradi1g11680.1	0.00294124	0.442902	1.79046e+06	1.67358e+06	1.02234e+06	2.03388e+06	1.63006e+06	625655	700431	853780	707970	721959
Bradi1g25220.1	0.00316999	0.224187	88296.9	31896	24897.7	32340.6	44357.8	12052.9	9212.02	9239.97	9272.85	9944.44
Bradi1g32310.1	0.00351092	2.64222	37719.6	22888.3	20067.6	19627.2	25075.7	68327.7	42218.1	72346.7	82129.3	66255.5
Bradi3g01210.1	0.00355215	0.657912	28808.1	32996.6	23109.8	31675.7	29147.5	19582.6	18485.1	21090.8	17547.5	19176.5
Bradi2g48570.1	0.00384723	0.161887	37043	17177.6	8380.76	16267.8	19717.3	3451.38	3700.36	1481.9	4134.3	3191.98
Bradi1g46670.1	0.00385118	0.359328	108921	66313.8	42532.5	79104.5	74218	25265.3	33431.2	21911.1	26066.7	26668.6
Bradi2g08100.1	0.0039652	4.13982	1160.99	3380.67	775.164	2392.31	1927.28	6593.2	7241.8	8210.38	9869.08	7978.61
Bradi1g15050.1	0.00416534	0.283731	42973.7	32445.4	15155.5	40442.7	32754.3	9613.32	10108.8	6390.83	11060.7	9293.43
Bradi2g37480.1	0.00433135	0.485456	102461	70564.9	58933	71540.2	75874.7	32667.8	39636.8	47056.7	27974.2	36833.9
Bradi3g35660.1	0.00462531	0.432598	83781.5	72442.1	42991.9	94220.3	73358.9	32542.1	35628.6	31894.9	26874.1	31734.9
Bradi4g38430.1	0.00463512	0.65117	213295	188985	168055	181102	187859	117253	100913	152842	118306	122328
Bradi5g18170.1	0.00510762	0.369457	736452	292583	329697	353796	428132	154605	178562	137000	162538	158176
Bradi1g25440.1	0.00541781	0.205922	323751	405104	129672	580291	359704	79451	58256.8	56876.7	101700	74071.1
Bradi1g17460.1	0.00548335	0.695968	1.12905e+06	963279	939105	861985	973355	643959	593592	665356	806788	677424
Bradi5g16740.1	0.00569686	0.264242	39901	14693.9	14495.2	18594.3	21921.1	7593.64	3464.12	7546.65	4565.5	5792.47
Bradi2g26760.1	0.00613961	0.486257	262929	186238	165789	220432	208847	76423.7	80936.9	146905	101948	101553
Bradi1g10630.1	0.00640912	0.387877	7149.24	6355.35	2978.84	6292.34	5693.94	2187.44	1907.15	1893.27	2846.35	2208.55
Bradi3g35700.1	0.00690669	0.224881	134892	221262	152899	405678	228683	24177.3	45971.8	96196.8	39359.7	51426.4
Bradi2g55070.1	0.00696074	2.5461	66582.4	45131.2	59417.3	26090.6	49305.4	104805	124130	172027	101184	125536
Bradi1g73190.1	0.0069882	4.90527	1541.93	7233.9	4089.61	11944.4	6202.46	35557.8	21652.7	34523.7	29964.6	30424.7
Bradi1g25517.1	0.00768867	25.0638	0	408.325	0	0	102.081	5388.35	1795.58	1412.29	1637.97	2558.55
Bradi2g43150.1	0.00770233	1.99468	80386.8	124659	99222.2	102898	101792	215600	229897	127926	238742	203041
Bradi3g14340.1	0.00779202	0.581336	902738	620215	505040	678781	676694	459319	347126	389111	377990	393386
Bradi5g15550.1	0.00888872	6.29862	29294	3994.12	26656.7	9643.98	17397.2	151445	156839	66767.6	63262.1	109578
Bradi2g62010.1	0.00902979	1.66605	20170.4	23549.3	34908.9	28314.8	26735.9	48181.5	35917.6	48836.1	45238.3	44543.4
Bradi3g05010.1	0.00911279	2.48036	82429.9	56219.9	36066.7	42521.9	54309.6	81576.2	136784	146196	174272	134707
Bradi4g38510.1	0.00921036	0.419664	37403.6	19780.4	17912.4	16581.1	22919.4	7823.47	13039.2	7938.07	9673	9618.43
Bradi2g03460.1	0.00944367	0.345036	480281	219041	156602	204269	265048	84813.2	73867	120191	86933.3	91451.1
Bradi1g50270.1	0.00993609	1.59771	91276.1	91711.9	63947.3	67894.4	78707.4	147858	131611	99189.5	124350	125752
Bradi2g61560.1	0.0103047	0.487599	121778	53830.1	64178.1	79908.8	79923.7	41464.5	42958.4	36397.7	35062	38970.7
Bradi1g67517.1	0.010463	0.388404	39396.5	26700.8	13504.9	23221.7	25706	10540	7766.24	12387.1	9243.83	9984.31
Bradi1g75520.1	0.0104883	0.45609	2370.84	5443.85	3207.59	4966.18	3997.12	1748.52	1841.14	1634.77	2067.76	1823.05
Bradi2g10960.1	0.0115594	1.83911	12907.1	7161.89	9392.3	6297.38	8939.67	13420.3	15323.9	17696.1	19323.8	16441
Bradi1g54680.1	0.0116484	0.642269	10376.8	12732.8	14420.1	10840.7	12092.6	7252.12	8900.49	9010.74	5903.46	7766.7
Bradi1g24240.1	0.011653	1.62836	30212.7	49700.7	39276.1	53705.5	43223.8	59809.3	71465.5	78588.5	71672.6	70384
Bradi2g12790.2	0.0116643	2.23506	78060.8	78204.5	28112.2	53180.9	59389.6	116300	133471	136973	144213	132739
Bradi1g56720.1	0.011764	1.576	43847.1	74621.2	51534.2	54637.2	56159.9	107528	84839.9	79833.9	81831.5	88508.3
Bradi5g11980.1	0.0120247	1.84365	22137	20600	37049	27174.4	26740.1	38232.9	46788.6	66084.1	46092.4	49299.5
Bradi3g08900.1	0.0132122	0.526589	249673	145113	120743	136304	162958	77545.8	78985.7	82717.2	103999	85812
Bradi1g47140.1	0.0136995	3.07636	6149.13	2456.78	1536.42	2166.63	3077.24	7817.7	7868.25	6649.75	15531.1	9466.7
Bradi5g00925.1	0.0148535	23.5746	0	0	53.9085	251.797	76.4265	1268.25	2330.36	1861.18	1747.1	1801.72
Bradi3g16600.1	0.0148717	0.716545	86725.4	111460	78145	96242.6	93143.3	68011	70278.1	55476	73200.6	66741.4
Bradi1g10480.1	0.0152755	0.503212	132663	252784	157877	269132	203114	100710	101233	125149	81745.7	102209
Bradi2g03400.2	0.0157705	3.30167	2207.4	3313.12	843.495	3987.31	2587.83	10907.2	4889.01	10001.9	8378.61	8544.17
Bradi3g59520.1	0.0165143	0.649346	17707.8	17362.8	10873	15838.2	15445.5	9869.27	10628.3	11068.2	8552.04	10029.5
Bradi3g36930.1	0.0169652	0.592058	627363	567463	349100	599559	535871	364272	272705	281387	350704	317267
Bradi4g26877.1	0.0170912	0.103	14676.9	2527.5	5261.18	9023.29	7872.21	0	3243.37	0	0	810.842
Bradi4g36490.1	0.018088	1.42191	72706.6	99298.4	107393	77903.2	89325.3	136354	142159	108857	120682	127013
Bradi1g03720.1	0.0182017	1.93422	140890	89579.4	61786.1	51701.4	85989.1	145190	161259	178004	180836	166322
Bradi1g52680.1	0.0183317	1.50396	99092	70208.4	68408.2	56295.6	73501	94820.4	117724	105325	124300	110542
Bradi2g56347.1	0.0187805	0.114083	4189.47	35943.9	15858.7	50199.6	26547.9	2554.67	1792.03	4544.1	3223.9	3028.67
Bradi1g34750.1	0.019184	0.582973	8827.2	9066.08	9954.5	7449.68	8824.37	5114.91	3454.7	7768.1	4239.75	5144.36
Bradi1g25860.1	0.0195374	3.46956	914.819	8684.44	4019.65	4066.64	4421.39	13518.3	16598.6	13444.8	17799.4	15340.3
Bradi1g47767.1	0.0204776	0.243142	322901	83432.1	77354.7	95582.2	144817	31754.7	43463.4	49009.6	16616.9	35211.1
Bradi1g26510.1	0.0208189	1.36785	11224.3	12719.1	16365.9	11591.8	12975.3	19375.8	16632.3	15486.4	19498.4	17748.2
Bradi1g04660.1	0.0210033	0.492083	99770	69086.8	37548.4	58857.5	66315.7	30344.8	33176.7	37959.7	29050.1	32632.8
Bradi1g56580.1	0.0213156	1.96998	5286.38	4571.34	11746.7	6253.15	6964.4	16494	9972.17	15415.7	12997.2	13719.8
Bradi2g50500.1	0.0213953	0.236358	25010.5	5424.13	5662.97	5864.67	10490.6	3377.2	1823.72	2113.71	2603.48	2479.53
Bradi2g11250.1	0.0224447	5.36668	43.0995	394.528	208.486	25762.2	6602.07	33697.4	38029.1	34269.4	35728.7	35431.2
Bradi3g03720.1	0.0231648	0.674973	20688.7	24776.4	22418.9	15254.7	20784.7	15873.7	11662.3	13128.6	15451.8	14029.1
Bradi2g09950.1	0.0235304	0.668332	28496.3	17509.5	20082	22821.6	22227.3	17842.6	15627.5	12278.7	13672.2	14855.2
Bradi1g70700.1	0.0236663	3.42133	93838.6	9156.16	25530.7	8388.87	34228.6	110580	117304	146768	93776.9	117107
Bradi3g39740.1	0.0240723	0.425057	188872	117881	61639.1	79490.2	111971	59591.9	45905	45072.6	39806.4	47594
Bradi2g21990.1	0.0242211	1.42898	77422.8	112476	73291.7	93222.1	89103.2	108973	132824	151201	116307	127326
Bradi1g05980.1	0.0244708	0	0	4594.49	1930.22	5226.32	2937.76	0	0	0	0	0
Bradi1g78470.1	0.0249514	0.210163	22994.1	13693	8878.28	12521	14521.6	5096.23	5970.26	495.453	645.692	3051.91
Bradi3g12250.3	0.025377	1.56235	117530	68054.1	86030.4	69538.1	85288.2	129966	141205	103527	158303	133250
Bradi1g61790.1	0.0255416	2.19391	9841.08	9163.54	18280.9	10284.4	11892.5	15452.3	29837.1	38908.3	20166.3	26091
Bradi3g41150.1	0.0267413	0.619375	174796	109587	100517	114484	124846	74199.8	79224.9	58636.1	97245.7	77326.6
Bradi2g01610.1	0.0271849	0.338297	22789.5	19235.1	5580.31	11582.3	14796.8	6497.73	5258.29	4053.98	4212.87	5005.72
Bradi1g18550.2	0.027929	0.522207	213603	91748.1	107818	106562	129933	61441.7	61179.6	61010.2	87775.5	67851.7
Bradi4g13640.3	0.0279854	0.519571	37980.9	24198.6	14414.9	21003.2	24399.4	14732.7	12455.5	12251.3	11269.4	12677.2
Bradi5g11340.1	0.0280143	0.0813604	866.526	6002.83	2736.69	13987.3	5898.33	1033.55	236.423	51.4357	598.15	479.89
Bradi4g31150.2	0.0288168	0.718977	365010	361853	316222	242333	321354	208090	245490	263047	207558	231046
Bradi3g15050.1	0.0289032	0.65705	100126	172990	111473	97952.3	120635	70923.3	80362.9	81853.1	83914.3	79263.4
Bradi4g04120.2	0.0290067	0.767614	150571	153470	120233	161791	146516	124029	108502	94000.6	123340	112468
Bradi1g30130.1	0.0293242	0.798809	83034.6	69782.3	91777.8	88023.6	83154.6	62554.8	59208.9	70781.9	73152.9	66424.6
Bradi3g43560.1	0.0300052	0.415088	89391.3	43620.5	28666.4	37591.5	49817.4	27374	14691.8	15643.6	25005.1	20678.6
Bradi1g08930.1	0.0317719	0.573472	11582.8	25010.1	17279.3	23920.4	19448.1	12654.7	9964.53	11247.1	10745.4	11153
Bradi3g41090.1	0.0322158	0.65707	22032.5	14958.2	15385.3	12789	16291.2	8916.55	9042.38	12717.3	12141.7	10704.5
Bradi3g41480.1	0.0322699	0.304671	1692.33	7470.2	6509.25	7684.85	5839.16	2069.6	1933.43	1277.44	1835.61	1779.02
Bradi1g38025.1	0.0327254	0.627433	21599.3	24124.8	28465.3	17104.7	22823.5	14172.4	18455.2	9666.96	14986.4	14320.2
Bradi5g21140.1	0.0327875	1.6425	18930.9	8906.26	16291.1	11234.8	13840.8	18660.9	26254.9	20398.7	25619.4	22733.4
Bradi1g24960.1	0.0331928	0.436293	38722.8	18797	13373.7	17940.2	22208.4	6641.83	7060.53	14200.4	10854.7	9689.38
Bradi1g04950.2	0.0332433	0.508873	253816	138194	104493	107779	151071	82898.6	63311.1	93813.6	67479.9	76875.8
Bradi5g14490.1	0.0334609	2.47066	2421.28	13641.9	5858.63	9257.82	7794.91	14354.6	18573.4	24773.2	19333.2	19258.6
Bradi2g06467.1	0.0339102	0.744248	127654	102341	83013.8	87836.4	100212	76868.8	66358.9	77591.5	77509.5	74582.2
Bradi1g51650.1	0.0349269	0.743786	246578	163719	160192	192174	190666	141681	146067	149271	130239	141815
Bradi5g24530.1	0.0358864	0.581473	55894.6	30644.2	35537.9	25098.7	36793.8	16758.2	22592.5	23682.3	22545.5	21394.6
Bradi4g40150.1	0.0370682	0.446228	8513.62	4951.6	3659.98	6913.44	6009.66	3537.96	2672.59	3335.74	1180.41	2681.68
Bradi3g10500.1	0.0372473	0.13384	61161.3	33310.9	5710.39	7164.64	26836.8	4543.81	3973.09	2996.64	2853.83	3591.84
Bradi1g52220.1	0.0377915	0.341017	34919.5	10152.8	19791.2	12261	19281.1	2896.32	10058.7	9116.4	4229.3	6575.19
Bradi3g40560.1	0.0380517	0.226499	69468	14735.5	18473.6	9336.76	28003.5	6207.67	6628.75	4206.81	8327.75	6342.74
Bradi3g49250.2	0.0382909	0.262732	31408.8	20041.5	10008.6	6778.95	17059.4	1327.1	4624.36	5181.52	6795.3	4482.07
Bradi1g05740.1	0.0384963	0.304191	29157.4	8538.45	35767.6	13883.1	21836.6	11340	7148	2938.2	5143.76	6642.5
Bradi2g60150.2	0.0399903	0.0125938	8746.04	1093.49	3189.23	152842	41467.7	491.542	239.841	821.31	536.245	522.235
Bradi2g58370.5	0.0403922	0.126001	2706.75	2412.25	1279.24	174.495	1643.18	266.367	165.2	138.825	257.78	207.043
Bradi2g54890.1	0.0407767	0.471577	24712.5	11812.4	10499.2	9194.65	14054.7	8510.21	4098.33	7121.43	6781.5	6627.86
Bradi4g19470.1	0.041476	0.493493	102464	57553.8	36721.8	40157.6	59224.3	30961.6	24048.5	29356.2	32540.7	29226.7
Bradi3g36520.1	0.0426496	2.24795	34304	30708.6	13153.1	56822.6	33747.1	66419.8	84628.8	47449.5	104949	75861.8
Bradi2g34650.1	0.0431835	0.345435	3.12962e+06	1.29845e+06	715418	809450	1.48823e+06	413175	436337	567482	639357	514088
Bradi4g17020.1	0.0435697	1.6689	23353.8	21703.7	41554.3	16790.8	25850.7	31522	50274.6	47545.5	43226.8	43142.2
Bradi1g24860.3	0.0442442	19.5292	0	195.337	236.942	875.241	326.88	7647.38	1522.2	6861.82	9503.46	6383.72
Bradi3g13800.1	0.0444646	0.361129	115043	54882.9	23112.7	47864.3	60225.8	27103.2	19673.1	16436	23784.9	21749.3
Bradi1g20880.1	0.0448479	0.615597	74408.3	43858.1	32603.4	49074	49986	33287.2	29144.6	28377	32276	30771.2
Bradi2g35620.1	0.045162	0.761305	317086	330480	212688	277790	284511	221974	206133	207873	230418	216599
Bradi2g33450.1	0.0452529	0.518985	87322.9	63774.5	30079.5	47709.2	57221.5	33670.7	31011.5	27201.1	26905	29697.1
Bradi1g17970.1	0.046331	0.510682	36313.4	23690.7	13093.3	17647.7	22686.3	13770.2	8467.76	10301.8	13802.1	11585.5
Bradi3g39420.1	0.0469214	0.407076	93593.4	29400.3	29512.4	27275.7	44945.5	18662.6	16010.7	20784.5	17727.1	18296.2
Bradi3g49230.1	0.0469354	0.638862	538808	418924	258491	363961	395046	254922	203966	277383	273249	252380
Bradi1g66590.1	0.0488162	1.57983	401813	273890	304899	249600	307550	341014	431120	482964	688408	485877
Bradi3g28820.1	0.0490916	0.649009	1.6189e+06	861060	813825	961108	1.06372e+06	743442	645001	682296	690727	690367
Bradi1g08570.1	0.0504119	2.23277	635.321	2063.83	2020.35	1188.81	1477.08	2040.22	3994.7	4806.08	2350.88	3297.97
Bradi1g02090.2	0.0515455	0.679033	94613.6	56478.7	69029.3	92159.5	78070.3	41341.2	48457.2	61111.6	61139	53012.3
Bradi2g36000.1	0.0516218	0.100431	9154.5	9226.5	2009.08	7547.95	6984.51	2216.41	589.437	0	0	701.462
Bradi1g25430.2	0.0523655	2.23989	43362.2	12993.4	30498.5	8565.67	23854.9	45978.5	37375.4	55519.1	74856.7	53432.4
Bradi1g60320.1	0.052844	0.186159	8663.74	31531.3	2939.74	21919.7	16263.6	3232.66	1287.33	4144.63	3445.88	3027.62
Bradi3g51200.1	0.0533797	22.5546	0	1387.77	2417.47	1147.57	1238.2	28821.9	18466.4	39082.7	25338	27927.2
Bradi1g06340.1	0.0534858	0.656737	13871.8	11593.3	13418.4	10266.1	12287.4	7196.77	7769.14	12221.9	5090.58	8069.59
Bradi2g58050.1	0.0540977	0.704824	904028	849362	560365	955108	817216	618079	464563	638590	582739	575993
Bradi1g13900.1	0.0549609	0.434212	19356.4	11770.1	33568.3	11230.5	18981.3	4842	8219.8	13746.8	6159.03	8241.92
Bradi3g37830.1	0.0551786	9.40845	0	0	1320.16	1365.32	671.371	3958.73	9890.01	6697.19	4720.33	6316.56
Bradi2g26770.1	0.0555087	0.272297	4303.77	21396.5	23314.1	23903.2	18229.4	2344.24	2198.09	10064.5	5248.38	4963.8
Bradi3g01477.1	0.0559268	0.720339	251912	215288	151496	224678	210843	151504	153001	122453	180558	151879
Bradi1g09460.1	0.0561717	2.42175	28618.2	8145.27	19294	84163.4	35055.2	67016	107849	60300	104415	84895
Bradi4g43910.1	0.0567195	1.72464	12676.9	13031.2	35102.6	15821.9	19158.1	28967.4	25519.3	42726.3	34950.6	33040.9
Bradi4g42810.1	0.0576297	0.60531	127080	59657.6	58670.3	67544.5	78238.1	43535.5	49106.9	41714.9	55076	47358.3
Bradi3g17680.1	0.0608312	0.677806	4962.59	6295.56	3592.08	6396.1	5311.58	3530.55	4220.98	3881.57	2767.78	3600.22
Bradi1g69710.1	0.0609466	3.35474	3636.47	17021.1	561.344	7383.15	7150.53	16159.7	23166.2	38559	18067.6	23988.1
Bradi2g56890.1	0.0617015	0.615624	154147	129328	65353.7	95859.7	111172	64804.9	66559.9	68190.4	74205.9	68440.3
Bradi1g04220.1	0.0641162	2.03758	14032.5	5103.29	34668.2	19503.8	18326.9	38172.7	40093.3	39560.9	31543.6	37342.6
Bradi2g24290.1	0.064758	0.408245	1901.52	4590.44	3583.44	2991.63	3266.76	792.928	1689.04	315.734	2536.85	1333.64
Bradi5g13960.1	0.0648059	2.12502	11875.9	31283.5	29583.9	31591.7	26083.7	28731.6	52018.5	88632.6	52330.9	55428.4
Bradi2g35440.1	0.065915	0.776749	236579	229129	241591	186683	223495	134255	158160	212139	189844	173600
Bradi4g36240.1	0.0664628	1.40339	136186	154125	89575.9	134479	128591	144880	171879	172774	232325	180464
Bradi4g08030.1	0.0665457	1.95641	10817.2	32853.9	39053.9	15438.1	24540.8	59585.8	31118	41877.9	59465.9	48011.9
Bradi2g51770.1	0.0674488	0.65763	159034	102612	75892.7	86451.5	105997	74103.8	71066.2	75446.4	58212	69707.1
Bradi3g13820.1	0.068272	0.729345	23134.8	37008.3	20772	28930.9	27461.5	20486	18294.2	20972.6	20362.8	20028.9
Bradi3g23167.1	0.0690881	2.52994	2084.97	939.427	2478.12	20816.1	6579.65	20886.9	17294.5	7077.21	21325.9	16646.1
Bradi3g59970.1	0.0700377	0.319279	223384	78361.6	32161	68099.8	100502	38243.9	22420.4	36889	30799.1	32088.1
Bradi5g27260.1	0.0705976	1.65448	69916	78264.8	24670.7	51627.9	56119.8	84890.9	100932	81424.6	104150	92849.3
Bradi1g58380.1	0.0716828	0.659848	421907	239523	430697	244714	334210	186130	227257	251129	217594	220528
Bradi1g63610.1	0.0718692	0.674436	1.33183e+07	7.69623e+06	7.56126e+06	6.57336e+06	8.78728e+06	5.58303e+06	5.29118e+06	6.72532e+06	6.10627e+06	5.92645e+06
Bradi4g39970.1	0.0719366	0.690631	4342.78	3171.16	3952.96	3292.23	3689.78	2130.54	1632.86	2920.67	3509.04	2548.28
Bradi5g01420.1	0.0719908	3.31465	14125.4	1514.23	1921.32	18615.6	9044.14	13169.3	23644.1	23015.7	60083.6	29978.2
Bradi1g72430.1	0.0721679	2.64572	2227.44	26188.6	2624.48	16873.3	11978.5	23052.1	20281.5	41986.7	41446.3	31691.6
Bradi2g37400.1	0.0735117	0.425166	31055.7	16977.4	9377.55	11907.8	17329.6	7415.84	2749.44	8353.58	10953	7367.96
Bradi3g14790.1	0.0749859	1.88759	19526.7	52796.6	8518.83	25321.3	26540.9	48599.7	41372.1	60503.3	49917.5	50098.2
Bradi2g43110.1	0.076133	0.61591	2.16487e+06	1.20976e+06	1.07714e+06	957093	1.35221e+06	614420	986936	817985	912030	832843
Bradi2g43510.1	0.0775026	0.54256	2603.89	2343.09	1199.35	2691.99	2209.58	2083.45	795.059	710.37	1206.45	1198.83
Bradi1g30550.1	0.080507	0.37075	413330	100539	83266.7	195583	198180	86907.4	67848.2	50596.8	88548.2	73475.2
Bradi5g12227.1	0.0806117	1.96142	2831.74	1236.24	11108.2	4273.08	4862.31	9300.78	8386.26	11585.3	8875.66	9537.01
Bradi1g21630.1	0.0815047	0.694506	57120.3	47589.9	30522.3	45208.3	45110.2	31001.9	24143.9	29227.2	40944.3	31329.3
Bradi3g36970.1	0.0826952	1.44375	29855.1	46691.3	43458	38822.3	39706.7	39313.5	56539.8	77371.7	56080.8	57326.4
Bradi1g67430.1	0.0839127	0.733489	0	0	0	14478.9	3619.74	4875.74	1321.05	245.503	4177.85	2655.04
Bradi4g39470.1	0.0850309	1.44991	18660.1	9094.88	14799.2	7789.33	12585.9	19295.7	19532.9	18047.2	16117.8	18248.4
Bradi5g24690.1	0.0854482	1.29583	2.80069e+07	2.00585e+07	2.63294e+07	1.66303e+07	2.27563e+07	2.51256e+07	2.9108e+07	3.09393e+07	3.27802e+07	2.94883e+07
Bradi1g55510.1	0.0870786	0.79569	27582.7	27862.4	23092.8	37210.5	28937.1	20685	23238.2	23518.8	24657.8	23025
Bradi3g27530.1	0.0886781	2.42526	5757.65	4336.69	1277.72	4716.96	4022.26	7692.89	14926.3	4046.64	12354.2	9755
Bradi2g61070.1	0.0893605	0.11037	6344.14	6034.83	1776.64	7267.76	5355.84	448.149	1442.52	0	473.827	591.125
Bradi1g03760.1	0.090489	12.7364	0	2748.56	4581.75	2253.14	2395.86	22101.2	25826.4	50957.9	23173.7	30514.8
Bradi1g12787.1	0.0907589	1.60814	78420.1	55400.3	23183.6	40338.4	49335.6	96743.3	81631.4	60718.5	78261.8	79338.7
Bradi5g13000.1	0.0912032	0.665317	11802.1	21699.5	24546.2	20442.4	19622.5	10632.3	16832.5	13659.9	11096.2	13055.2
Bradi3g49830.1	0.0917952	2.57734	458.817	7334.83	5065.24	7970.92	5207.45	11128.6	13474.2	13741.3	15341.4	13421.4
Bradi3g47690.1	0.0920786	1.71503	32548.9	30181.6	57142.1	15608.1	33870.2	37035.5	70076.8	55908.9	69331.7	58088.2
Bradi3g42360.1	0.0926955	0.613333	21799.8	16638.6	9112.9	15078.2	15657.4	10857.2	12788.3	6325.27	8442.04	9603.18
Bradi1g59220.1	0.0933766	0.55725	80448.4	61981.6	118622	40059.1	75277.7	51206.9	38150.7	27698.9	50737.5	41948.5
Bradi5g16400.1	0.0940516	1.27051	206094	135882	121698	129429	148276	195368	161142	201355	195675	188385
Bradi1g76330.1	0.0943732	0.601973	214346	145210	259242	115937	183684	63646.9	120172	131299	127173	110573
Bradi2g12520.1	0.0950333	2.56612	14916.9	9828.19	2522.44	22800.1	12516.9	21796.1	22676.1	20578.7	63428.3	32119.8
Bradi3g01470.1	0.0955155	0.377207	54679.2	25450	23286.9	9215.5	28157.9	4877.44	11159.3	14788.4	11660.3	10621.4
Bradi2g45420.1	0.0956223	0.656218	127745	119252	58257.9	121820	106769	76084.8	73230.6	65350.5	65588.5	70063.6
Bradi1g00700.1	0.0958192	3.22752	13658.9	2366.49	550.022	14588.3	7790.94	27840.3	35442.6	7808.71	29490.1	25145.4
Bradi4g39550.1	0.0968404	1.71373	6412.68	2139.86	4751.15	4447.34	4437.76	4476.85	7327.52	9013.3	9602.84	7605.13
Bradi3g30510.1	0.0981568	4.4274	96.5744	13423.5	911.422	26276.2	10176.9	23145.1	105327	14070	37687.7	45057.4
Bradi2g07940.1	0.100793	0.536801	1.81399e+07	9.17969e+06	5.07982e+06	8.74972e+06	1.02873e+07	6.31241e+06	6.15207e+06	4.53933e+06	5.0851e+06	5.52223e+06
Bradi2g50010.1	0.101069	0.602314	9820.56	20125	25956.7	21874.7	19444.2	12849.4	14769.7	9559.4	9667.75	11711.5
Bradi4g00335.1	0.101129	1.7802	3883.96	8784.01	1610.28	4795.47	4768.43	11116.1	6009.55	8364.05	8465.42	8488.77
Bradi1g53290.1	0.101748	0.632111	300619	158532	206598	117137	195722	118429	118017	147310	111116	123718
Bradi1g15290.1	0.102184	0.546824	18414.8	21274.6	43053.8	19710.4	25613.4	22812.6	17397.5	8261.31	7552.6	14006
Bradi2g19030.1	0.102563	3.32593	0	2754.24	0	1847.46	1150.42	4041.97	3909.23	5148.78	2204.94	3826.23
Bradi4g31680.1	0.104401	0.605391	28637	11245.3	18216.7	11802.4	17475.4	9769.91	10219.2	9758.29	12570.3	10579.4
Bradi3g30260.1	0.104411	1.92933	63698.5	342441	574169	246873	306796	690618	510704	654540	511783	591911
Bradi4g36601.1	0.104436	0.676163	8.25786e+06	5.09934e+06	1.02699e+07	5.06714e+06	7.17355e+06	4.48771e+06	5.11589e+06	4.60798e+06	5.19039e+06	4.85049e+06
Bradi1g59280.1	0.104565	0.607371	138711	104959	51754.8	118667	103523	71162.2	49785.4	59896.4	70664.1	62877
Bradi3g14120.3	0.104649	0.690003	527682	300717	243261	413908	371392	248558	261899	253421	261168	256261
Bradi2g34440.1	0.104802	0.603164	157207	62283.7	62762.6	78187.6	90110.1	48543	63598.7	50912.9	54350.1	54351.2
Bradi1g02440.1	0.105128	1.64276	2750.11	7738.73	11030.2	5287	6701.5	12684.3	11316.2	12096.8	7938.6	11009
Bradi3g29750.1	0.105801	0.465508	19888	45028.7	89374.6	40012.6	48576	33039.9	24930.4	16069.2	16410.5	22612.5
Bradi4g07880.1	0.106152	0.177673	105868	83791.5	5951.46	89044.2	71163.9	17051.5	8318.76	10462.9	14742.3	12643.9
Bradi1g54305.1	0.107509	5.96826	0	220.98	606.124	1777.4	651.125	5740.85	3959.62	1483.1	4360.78	3886.09
Bradi1g60207.1	0.109108	1.56378	198222	56587.7	113266	73527.9	110401	132880	200746	157486	199459	172643
Bradi1g54990.1	0.111104	2.33274	3846.96	502.905	10946.2	10674.9	6492.75	15443.3	14969.2	17505.8	12665.4	15145.9
Bradi3g33570.1	0.111858	0.74885	108075	103382	93005.9	122845	106827	69152.6	57801.3	124342	68694.1	79997.4
Bradi3g33990.1	0.113091	1.65261	8979.29	50886.9	19585	23676.5	25781.9	50163.6	41222.7	34379.2	44664.6	42607.5
Bradi1g13777.1	0.113426	2.61251	666.49	4844.49	307.709	7095.42	3228.53	6732.22	4861.7	5233.22	16911.1	8434.56
Bradi2g11480.1	0.113955	0.362491	150640	78311.8	20141.3	78717.5	81952.7	20784	34330.5	37387.6	26326.4	29707.1
Bradi2g47970.1	0.11494	1.27083	55777.5	58078.6	85773.5	50852.1	62620.4	81059.6	72650.1	68601.4	96008.3	79579.8
Bradi3g47240.1	0.115146	1.19121	25355.8	22214.5	23817.6	20378.8	22941.7	27528.2	24534	23676	33575	27328.3
Bradi2g55430.1	0.116432	6.38694	0	617.307	1017.4	1887.22	880.482	4764.93	6931.85	3641.97	7155.57	5623.58
Bradi3g37010.1	0.116869	3.88466	3199.25	4482.64	244.745	1645.52	2393.04	1506.72	11839.6	11077.8	12760.5	9296.15
Bradi5g16720.1	0.117923	1.32613	1.52391e+06	1.15882e+06	1.30413e+06	807230	1.19852e+06	1.71129e+06	1.22332e+06	1.85616e+06	1.56682e+06	1.5894e+06
Bradi3g13600.1	0.118865	0.553895	537584	292590	146955	313632	322690	157037	166088	189208	202614	178737
Bradi2g22897.1	0.12073	2.48703	0	18809.9	0	31567.8	12594.4	37808.7	26227.2	27441	33813.8	31322.7
Bradi3g11280.1	0.121177	0.533775	10963.5	5301.07	3136.73	5650.66	6262.99	2100.69	3672	5149.26	2450.18	3343.03
Bradi5g13120.1	0.121672	0.662332	483141	307975	189377	313911	323601	256892	202627	188077	209729	214331
Bradi2g51980.1	0.121733	0.698782	777966	580107	338756	556176	563252	389968	356195	431671	396527	393590
Bradi4g32680.1	0.123836	0.185552	57520.1	5285.51	10282.4	3934.43	19255.6	146.282	4814.2	8570.99	760.228	3572.92
Bradi1g12050.1	0.12391	0.743706	86269.2	77561	45745.3	60245.2	67455.2	58267.7	45423.3	46782.6	50193.7	50166.8
Bradi2g25640.1	0.124207	1.91437	4048.56	12463.3	18290.1	4467.8	9817.46	8922.8	19861	22181.8	24211.3	18794.2
Bradi2g06740.1	0.125001	2.6542	234.649	10313.9	2047.17	7936.1	5132.95	10568.8	8398.16	24827.8	10700.9	13623.9
Bradi1g69530.1	0.126415	0.665899	21347.9	20290	10397.3	11183.2	15804.6	12064.2	11319.8	9892.03	8821.01	10524.3
Bradi1g23450.1	0.128241	9.07313	0	6897.89	3656.48	9890.03	5111.1	31425.6	39998.6	91630.6	22439.8	46373.7
Bradi2g52120.1	0.128257	0.00542401	174174	574.329	1367.93	413.628	44132.4	187.675	184.385	178.937	406.501	239.375
Bradi5g01230.1	0.12848	1.15293	92237.9	84140.8	65225.7	74139.8	78936.1	91817.4	82860.6	89838.7	99515.1	91007.9
Bradi4g36370.1	0.128887	0.708717	337885	287830	526785	296787	362322	194593	228524	366214	237803	256783
Bradi2g35050.1	0.13018	0.468144	43258.9	30772.7	9051.88	22721.8	26451.3	14350.6	8522.44	9827.26	16831.8	12383
Bradi1g08157.1	0.131034	2.29062	5014.6	57056.3	626.65	54726	29355.9	54741.9	60302.6	79319	74609.5	67243.3
Bradi2g53400.1	0.133993	0	0	3950.21	4533.83	0	2121.01	0	0	0	0	0
Bradi2g45200.1	0.134157	0	8341.94	13418.8	0	0	5440.18	0	0	0	0	0
Bradi1g08260.1	0.134974	0.44217	87832.6	51883.7	16045.1	53837.9	52399.8	34194.6	16194.9	14755.3	27533.7	23169.6
Bradi4g31947.1	0.13505	2.3339	378.081	7384.92	7723.6	7742.27	5807.22	16931.1	13623.6	9953.99	13705.2	13553.5
Bradi3g44160.1	0.135355	0.816013	242825	212834	180072	204715	210111	138025	229848	156298	161643	171454
Bradi1g53680.1	0.136139	0.00956377	96411.2	995.531	179.014	1341.04	24731.7	251.898	0	218.902	475.313	236.528
Bradi1g63550.1	0.138106	1.17603	31821.9	44081	31207.3	37517.3	36156.9	36152.1	45613.6	42417	45903.2	42521.4
Bradi1g49270.1	0.138959	0.587364	24003.8	8928.35	21768.6	27280.5	20495.3	15816.9	10064.3	10528.3	11743.2	12038.2
Bradi1g09060.1	0.139507	0.660803	11433.4	6171.34	5993.8	7808.16	7851.67	7273	4682.3	2747.26	6051.09	5188.41
Bradi1g52260.1	0.13961	1.85831	111647	49875.1	86883	57275.1	76420	189734	77982.2	81169.4	219162	142012
Bradi2g11230.1	0.140444	1.18855	201335	180827	260682	163145	201497	211706	250969	256211	239072	239490
Bradi1g30672.1	0.141137	0.445621	3624.4	8300.44	19419.4	5815.59	9289.96	5234.63	4298.92	4021.38	3004.29	4139.8
Bradi2g45730.1	0.141634	5.18	0	789.19	1209.78	1996.85	998.954	7273.3	3500.32	3801.32	6123.37	5174.58
Bradi3g00330.1	0.142433	0.898197	56606.9	58050.3	46162.6	55945.1	54191.2	47904.6	51555.1	44534.1	50703.7	48674.4
Bradi4g23620.2	0.142626	1.94029	3545.11	36477.3	29624.7	29766.7	24853.5	52772.9	44460.4	35979.8	59678.7	48223
Bradi3g40140.1	0.147226	0.200258	1468.43	8067.64	39.6516	725.355	2575.27	0	119.301	1943.57	0	515.717
Bradi4g28640.1	0.147975	0.646231	159132	234039	379464	154276	231728	120319	165697	176037	136947	149750
Bradi3g29760.1	0.148989	0.629517	1.20727e+06	519873	805343	509531	760505	687215	518722	313334	395732	478751
Bradi4g44797.1	0.14923	0.751905	46357.2	47000.5	62236.4	32378.4	46993.1	37814.3	41479.1	26643.1	35401	35334.4
Bradi5g20107.1	0.149271	1.61646	0	9822.55	0	9586.04	4852.15	8767.71	7586.69	6306.72	8712.14	7843.32
Bradi3g55220.1	0.149544	0.69464	27106.1	13164.8	12889.8	17835.5	17749	10670	11396.2	16465.6	10784.9	12329.2
Bradi2g51440.1	0.149698	0.671075	16262.6	41862.3	23801.9	21915.6	25960.6	18086.2	16857.7	20064.7	14677.4	17421.5
Bradi2g11210.2	0.150536	1.71818	17967.8	23822.3	10614.3	13091	16373.8	32958.4	44297.3	14539.1	20738.1	28133.2
Bradi2g01710.1	0.150724	3.43903	0	315.118	4611.01	1445.64	1592.94	4467.77	4444.43	4288.46	8712.02	5478.17
Bradi4g01130.2	0.151444	0.672076	123358	223753	111387	246919	176354	126744	111419	125265	110666	118523
Bradi5g26500.1	0.152508	0.617981	19448.4	7808.55	13752.8	17246.8	14564.2	6182.46	14240.7	10450	5128.31	9000.37
Bradi2g43910.1	0.153087	1.56446	26230.4	77633.5	15221.5	59171.5	44564.2	61617	63563.9	64664.8	89029.9	69718.9
Bradi2g19750.12	0.15409	0.637276	82887.5	32358.5	34570.5	40320.4	47534.2	31486.1	27950.5	37896.9	23836.3	30292.5
Bradi4g00330.1	0.154495	1.31137	91769.5	76883.1	154755	58920.4	95581.9	117216	133390	128096	122669	125343
Bradi1g25647.1	0.154851	1.98972	1443.8	8021.1	15609.2	15933.9	10252	12323.1	18650.5	31287	19333.7	20398.6
Bradi5g23880.1	0.155892	4.33232	0	1111.92	1144.68	706.715	740.831	2500.21	3745.93	3738.06	2853.87	3209.52
Bradi1g26690.1	0.157531	1.85749	334.387	976.699	9727.63	11962.4	5750.28	12396.9	6912.34	11339.4	12075.7	10681.1
Bradi3g47010.1	0.158696	1.63731	691.417	5152.6	2719.81	2965.47	2882.33	5136.79	5374.5	3639.93	4725.76	4719.25
Bradi2g33676.1	0.158925	1.45345	23688.9	76849.8	24068.5	61233	46460.1	55549.3	70424.6	70859.9	73275.2	67527.3
Bradi1g25552.1	0.159708	2.29966	8455.43	2631.4	578.666	1336.23	3250.43	8474.3	12646.6	6771.87	2006.83	7474.9
Bradi1g78660.1	0.16033	4.07236	519.723	1844.94	0	1052.7	854.34	3696.48	2129.09	2825.32	5265.82	3479.18
Bradi3g59710.1	0.160467	1.30609	27289.7	29368.6	18485.7	16959.9	23026	26050.6	23412.4	35844.1	34989.2	30074.1
Bradi3g53700.1	0.160938	0.767877	54574.1	40166.5	49950.7	30958.2	43912.4	29677.5	33133.3	28235.1	43831.3	33719.3
Bradi3g52460.2	0.161381	0.695762	523571	300422	230292	246791	325269	255043	193793	219670	236732	226310
Bradi2g39810.1	0.162245	0.685741	17030	9016.45	7553.09	7705.14	10326.2	7843.28	5782.75	6963.87	7734.41	7081.08
Bradi2g35090.1	0.162504	0.774447	72923.3	92920.1	58554.6	63730.2	72032	53046.5	42745.5	47710.6	79637.4	55785
Bradi2g27190.1	0.166006	0.650803	71813.7	44999.4	25194.2	34500.9	44127.1	26303	31393.8	31026.7	26148.6	28718
Bradi1g16510.1	0.168184	0.677272	61427.6	126032	160310	92360.6	110033	73888.1	69378.2	83188.8	71633.1	74522.1
Bradi2g35020.1	0.173169	0.504518	341288	236980	172511	161348	228032	11783.6	158592	121413	168396	115046
Bradi1g69670.1	0.175356	1.51339	26341.8	27993.2	8039.72	25404.9	21944.9	23027.8	36182.2	31991.2	41643.8	33211.3
Bradi2g38170.1	0.176257	0.75494	272665	190037	132949	176459	193027	116826	141324	168608	156138	145724
Bradi2g59210.1	0.176881	1986.11	0	0	0	1.95628	0.489071	3435.99	0	0	449.408	971.35
Bradi5g22290.1	0.177485	1.41273	3547.76	4550.45	5922.98	3719.94	4435.28	6206.9	9175.79	5772.46	3908.23	6265.84
Bradi1g54030.1	0.179184	1.64713	687.375	5292.52	7717.97	2685.69	4095.89	7136.6	6149.79	5605.21	8094.26	6746.46
Bradi3g57380.1	0.180791	2.81637	4637.7	0	715.696	548.678	1475.52	5225.81	6471.76	1896.47	3028.39	4155.61
Bradi4g36800.1	0.182168	1.2578	78140.2	97494	153393	71885	100228	107254	141198	126316	129499	126067
Bradi5g05180.1	0.182198	1.20547	57754.5	75976.9	46965.5	49475.4	57543.1	75067.2	55866.6	69058	77473.7	69366.4
Bradi1g31180.1	0.182482	0.115908	10471	2027.73	132.072	2299.55	3732.59	755.811	538.268	191.91	244.557	432.637
Bradi1g30210.1	0.183521	0.719871	20766.5	24992.6	13730.6	26812.1	21575.5	16458.8	14821	9580.68	21265.7	15531.5
Bradi1g68290.1	0.184006	0.603349	27082.3	9015.16	12879.5	11000.2	14994.3	5292.29	10168.8	13332.7	7393.43	9046.79
Bradi4g23250.1	0.18558	0.598942	204927	58476.1	85722.4	91789.6	110229	68231.3	53270.3	70049.4	72531.7	66020.7
Bradi1g06450.1	0.186069	0.825096	210363	165917	134118	192037	175609	135826	118826	169816	155109	144894
Bradi1g66440.1	0.187025	0.709236	141608	124721	63182	124315	113456	71474.9	77264.2	108182	64948.5	80467.4
Bradi5g12540.1	0.187161	2.13188	1059.49	0	0	3871.5	1232.75	184.438	5603.2	932.273	3792.34	2628.06
Bradi1g43770.1	0.18761	0.226454	1662.28	94.3731	494.843	7986.18	2559.42	1148.73	0	0	1169.63	579.59
Bradi2g53340.2	0.188925	0.738625	222852	128541	99857.9	124099	143838	101039	107169	100945	115815	106242
Bradi3g16150.1	0.189878	0.524557	98053.3	28723.6	25736.8	29410.7	45481.1	26767.8	19098.6	24961.4	24601.9	23857.4
Bradi2g12830.1	0.189916	3.44116	0	13788.7	2308.03	10549.3	6661.51	23976.3	19500.4	25624.2	22592.3	22923.3
Bradi1g72762.1	0.190291	0.472861	6957.15	9810.77	2064.56	3628.7	5615.29	3081.8	759.282	2420.95	4358.98	2655.25
Bradi1g05030.1	0.192901	0.308094	143530	19844.9	25421.9	16106.7	51226	15922.6	16684.1	15500.6	15022.3	15782.4
Bradi2g14567.1	0.193484	1.68111	1267.55	5336.18	918.737	7804.43	3831.72	8448.78	7866.09	3302.02	6149.35	6441.56
Bradi3g47840.1	0.193951	0.488681	16094.3	31087.1	5643.9	22272.2	18774.4	9540.97	6904.38	12075.6	8177.76	9174.68
Bradi1g49760.1	0.195885	1.72864	57.4106	1761.9	517.439	2723.65	1265.1	1765.44	2277.69	2389.77	2314.74	2186.91
Bradi1g59380.1	0.196111	0.739193	98083.7	71808.8	49599	54386.2	68469.4	40554.5	41664.8	71293.2	48935.9	50612.1
Bradi2g31910.1	0.196718	1.18917	141608	134012	88848.1	99838.7	116077	124745	139271	162260	125862	138035
Bradi2g47267.1	0.196924	1.59634	11396.4	17862.5	2845.26	9967.69	10518	24054.1	11591.4	13638.5	17877.1	16790.3
Bradi2g23630.1	0.196948	0.00544406	497381	1406.25	1332.98	1214.31	125334	841.874	490.586	758.859	637.978	682.324
Bradi2g12280.1	0.197085	0.767941	50634.2	27673.1	29012.7	35035.6	35588.9	20568.6	30220.1	25468.7	33063.3	27330.2
Bradi3g20060.1	0.197121	1.40717	24213.9	88062.5	21390.5	50786.7	46113.4	50266.3	67158.5	65944.3	76187.6	64889.2
Bradi3g59627.1	0.197167	1.76771	2179.87	28061.6	48060.4	30106.3	27102	47378.7	54179	47985.3	42090.6	47908.4
Bradi5g17300.1	0.197481	4.2704	0	435.19	181.615	2247.55	716.088	7712.59	3457.68	463.188	598.46	3057.98
Bradi4g24197.1	0.20085	0.99281	0	4659.36	0	3824.64	2121	2830.68	2615.34	1872.42	1104.55	2105.75
Bradi2g55150.1	0.20248	1.26032	37138.7	35428.6	17796.6	24305	28667.2	34908.8	32108.1	33623.7	43878.7	36129.8
Bradi2g05680.1	0.202604	2.26873	1228.45	145260	195966	160251	125676	347265	258329	247788	287121	285126
Bradi3g05520.2	0.203398	1.41586	5458.27	18734	28328.2	11992.4	16128.2	21719.8	20043.5	23371.8	26205.8	22835.2
Bradi2g17970.1	0.205677	2.229	58.485	5901.42	6685.92	7852.22	5124.51	14869.9	8988.83	10428.6	11402.9	11422.6
Bradi5g09130.1	0.2069	3.20767	0	4032.37	1452.88	2111.55	1899.2	4999.4	10234.7	4181.57	4952.37	6092.01
Bradi4g14097.1	0.207362	1.57031	1943.17	7018.02	505.705	5932.58	3849.87	6410.71	5715.18	5064.08	6992.06	6045.51
Bradi1g66550.1	0.209918	1.30153	777697	369534	555868	376938	520009	475119	745168	733598	753354	676810
Bradi1g68210.1	0.210939	2.59465	0	4668.66	765.036	3154.74	2147.11	5242.96	4534.66	7270.58	5235.82	5571.01
Bradi5g18000.1	0.211701	2.00829	0	2785.77	207.138	2922.75	1478.92	3237.59	2745.36	3326.98	2570.46	2970.1
Bradi4g23850.1	0.213564	1.6627	1350.09	26161	15062.6	14488.2	14265.5	28022.1	20562.7	23868.4	22423.3	23719.1
Bradi1g72060.1	0.213606	3.09526	0	3059.39	3046.15	2215.93	2080.37	7417.37	6703.9	5232.99	6402.86	6439.28
Bradi4g33620.1	0.213967	1.58511	983.084	8411.9	9521.35	7173.15	6522.37	9769.23	11775.6	9983.63	9826.19	10338.7
Bradi2g22820.1	0.215777	1.9685	0	4764.15	1874.5	67303.8	18485.6	63545.3	6198.83	46732.9	29078.6	36388.9
Bradi2g55120.1	0.216102	1.81023	1113.35	35736.3	24611.8	25576.7	21759.5	38145	38316.1	32067.7	49030	39389.7
Bradi3g10720.1	0.217901	1.50174	963.138	8961.07	182.002	9505.85	4903.01	8478.8	7196.36	6832.8	6944.33	7363.07
Bradi5g12120.1	0.218629	0.467994	19494.7	10085.6	49626.1	10444.8	22412.8	10370	4755.42	15982.1	10848.7	10489.1
Bradi4g23180.1	0.219829	0.756137	220343	114429	111416	111166	139338	111845	99060.3	104281	106250	105359
Bradi2g56360.1	0.22126	0.180578	692.885	8546.92	943.37	13675.8	5964.75	1003.15	1059.3	1640.52	605.428	1077.1
Bradi1g24125.1	0.224081	1.68109	993.67	12158.6	13683.1	20083.2	11729.7	18380.6	25826.3	18162.4	16505	19718.6
Bradi3g19810.1	0.226346	0.773708	116930	79929.4	62348.1	60761.1	79992.1	70600.3	50087.5	60088.4	66785.7	61890.5
Bradi1g28090.1	0.226953	1.5538	659.257	2233.61	675.099	618.096	1046.52	800.45	1522.8	1610.65	2570.41	1626.08
Bradi4g18800.1	0.228937	2.59579	0	3071.52	1312.39	3936.6	2080.13	7022.87	5688.05	4787.36	4099.98	5399.57
Bradi1g67020.1	0.231972	2.28077	7059.39	10471.4	1.19322	2054.87	4896.71	9559.94	13955.4	8989.01	12168.7	11168.3
Bradi2g24190.1	0.232524	2.98348	0	11977.4	5396.11	8224.95	6399.61	15009.1	14444.2	16818.8	30100.4	19093.1
Bradi3g56527.1	0.233721	0.783606	52188.7	34761.8	25278	36059.5	37072	32809.6	23584	30771.8	29034.1	29049.9
Bradi3g01080.1	0.23382	1.30436	32737.3	54350.6	18426.7	38304.7	35954.8	35350.2	46937	54945.4	50359.3	46898
Bradi1g63320.1	0.235687	0.519547	42302.2	30643.9	8345.57	19633.6	25231.3	1293.63	29591.8	7078.66	14471.3	13108.9
Bradi1g11500.1	0.236222	0.621286	25760.6	49370.7	12755.9	28164.4	29012.9	17834.3	19225.6	16476.3	18564.9	18025.3
Bradi5g21870.2	0.236502	2.22267	0	7358.24	1093.65	4775.97	3306.97	6993.46	10459.7	6403.86	5544.23	7350.31
Bradi5g08370.1	0.236528	2.78627	0	8505.68	11079.8	5654.69	6310.04	19697.3	15597.6	18748	16282.9	17581.5
Bradi2g37980.2	0.236593	1.73711	388.295	7241.38	6612.78	5190.25	4858.18	6390.34	7064.3	13189.9	7112.23	8439.2
Bradi1g19880.1	0.236776	1.64978	30309.1	51710.8	2242.61	42393.3	31664	42179.3	50224.7	53814.5	62735.2	52238.4
Bradi1g54270.2	0.239386	0.673932	74470	65182	27475	75888.6	60753.9	34443.6	42279.7	41886.9	45165.8	40944
Bradi1g10950.1	0.241834	1.54751	6730.87	10278	6495.92	4087.24	6898.02	4894.99	11389.9	10472.8	15941.2	10674.7
Bradi4g28360.2	0.243229	1.40187	11001.6	5906	2322.5	4372.08	5900.55	6185.7	7453.18	12043.6	7404.85	8271.84
Bradi1g75820.1	0.245474	1.41576	1233.71	826.017	6751.44	2300.03	2777.8	2490.94	3994.83	5833.7	3411.37	3932.71
Bradi3g39010.1	0.246135	0.000279808	1.31414	14509.6	0	9.50569	3630.1	0	0	0	4.06293	1.01573
Bradi2g22670.1	0.250357	2.66096	0	3046.68	3725.98	3117.91	2472.64	6399.12	4531.76	11236.5	4151.08	6579.61
Bradi1g23250.1	0.250417	1.48953	2985.95	13832.5	28332.8	16707.6	15464.7	15206.2	29219.1	22904	24811.1	23035.1
Bradi3g00500.1	0.251786	0.480291	164608	33906.4	30654	60728.5	72474.3	36833.3	36433	30065.2	35903.5	34808.8
Bradi1g06050.1	0.252522	2.49302	0	8150.63	9104.72	4971.54	5556.72	12608.4	11803.2	12773.2	18227.3	13853
Bradi3g09760.1	0.254254	2.54327	0	2804.34	2315.27	6690.49	2952.52	8821.39	7180.5	2534.66	11499.7	7509.06
Bradi1g55740.1	0.25625	2.14603	0	3765.83	8083.07	1472.82	3330.43	8022.62	9129.78	3065.73	8370.6	7147.18
Bradi1g38010.1	0.258866	1.59725	405.368	5311.31	2629.1	4418.51	3191.07	7075.13	2962.75	4370.15	5979.72	5096.94
Bradi5g23842.1	0.259543	0.763074	25221.9	13275.5	11978.4	17660.6	17034.1	12154.9	13366.9	10111.8	16359.5	12998.3
Bradi1g37490.1	0.260057	1.21519	385536	366421	224903	496181	368260	433071	417822	391056	548077	447507
Bradi2g62790.1	0.260346	0.832061	81477	112381	119456	79749.1	98265.6	92859.5	92081.1	81873.9	60237.2	81762.9
Bradi5g26700.1	0.260405	1.5143	2269.86	30994.4	29982	17810.2	20264.1	27613.6	26467	28735.6	39927.7	30686
Bradi1g03610.1	0.260623	1.49242	1465.88	13981.2	27220.3	14675.9	14335.8	21125.4	17430.4	25104.1	21920.6	21395.1
Bradi1g13720.1	0.262639	0.0689075	0	1334.91	837.878	423.156	648.985	113.702	0	0	65.1779	44.7199
Bradi1g66030.1	0.267597	0.498985	201952	69524.4	33153.7	135374	110001	39541.3	44216.6	68847.4	66949.9	54888.8
Bradi1g50380.1	0.267807	2.17813	2.47766	8259.54	5927.03	5249.91	4859.74	5690.09	14935.2	12348.8	9366.43	10585.1
Bradi4g13670.1	0.271607	2.29721	0	6242.1	9883.34	19275.2	8850.16	23332.9	7996.96	24287.2	25705.6	20330.7
Bradi3g13810.1	0.27199	0.727465	3662.05	6338.68	2790.61	5968.44	4689.94	4769.14	3068.74	2445.85	3363.34	3411.77
Bradi2g23770.1	0.272818	1.45287	0	892.931	0	0	223.233	473	0	699.056	125.261	324.329
Bradi1g61510.1	0.27284	1.3989	3344.11	14577.2	17388.3	9774.33	11271	11921	17398.9	21091.7	12656.4	15767
Bradi1g15490.1	0.274229	1.45647	980.937	10617.3	7072.89	11110.3	7445.36	9532.37	11517.1	9360.26	12966.1	10844
Bradi1g30648.1	0.274359	1.40503	0.886377	14774.4	1283.84	18650.6	8677.42	11419.9	12177.2	11900.5	13270.6	12192.1
Bradi2g46380.2	0.275611	0.253904	451.268	8177.1	1015.5	7427.34	4267.8	213.084	1995.85	646.215	1479.3	1083.61
Bradi3g36420.2	0.275873	5.14743	0	60.8376	0	24962.2	6255.76	32765.6	34213.9	0	61824.9	32201.1
Bradi3g44400.1	0.276439	2.14963	0	11653.6	5981.95	10963.7	7149.82	11623.6	12251	18015	19588.3	15369.5
Bradi1g01560.1	0.276559	0.866377	8799.64	9075.14	6989.66	10509	8843.37	9700.98	7431.44	6980.8	6533.56	7661.69
Bradi3g42620.1	0.277533	1.43078	0	255.8	5344.31	1274.18	1718.57	4201.38	2385.86	2551.23	697.117	2458.89
Bradi2g20710.2	0.27935	0.821241	24575.6	23887.3	21962.6	14105.2	21132.7	17340	17697.7	20732.7	13649.7	17355
Bradi2g06250.1	0.279365	1.30834	0	9488.18	816.492	17168.2	6868.21	8615.34	9581.75	6661.9	11084.9	8985.97
Bradi1g20390.1	0.279811	2.35194	2113.88	5747.67	0	1891.79	2438.33	2602.36	2945.48	4030.33	13361.1	5734.82
Bradi3g17870.2	0.282741	1.26678	13873.2	13170.7	7202.31	8873.91	10780	9023.83	13450.6	15416.7	16732.8	13656
Bradi4g07450.1	0.282845	1.28242	20127.6	25012.6	18502	10930	18643	19575.3	24286.4	18251.6	33519.3	23908.1
Bradi4g29770.1	0.285132	0.29047	34828	18873.5	1652.11	27578	20732.9	3231.97	4197.73	10021.9	6637.54	6022.28
Bradi1g71370.1	0.285673	1.31415	62217.2	56043	46079.7	27564.6	47976.1	41568.5	53094.1	74964.6	82564.2	63047.9
Bradi2g47450.1	0.286109	1.96248	712.721	14185.1	83929.4	40969.3	34949.1	32173.5	157403	22241.3	62529.9	68586.8
Bradi5g02030.1	0.287881	1.97194	4650.67	5810.92	0	3442.33	3475.98	6090.56	9075.79	4771.38	7479.9	6854.41
Bradi2g30560.1	0.288772	1.93912	0	5536.56	6002.19	4099.69	3909.61	7651.04	8284.72	8220.42	6168.68	7581.21
Bradi1g29000.1	0.289591	1.85803	0	13262.9	29557.9	7573.5	12598.6	33152.8	23000.5	23896.8	13584	23408.5
Bradi2g16570.1	0.292121	1.96775	5.50315	73093.2	67537.9	71452.1	53022.2	94525	100887	140674	81251.8	104335
Bradi4g19457.1	0.293245	0.837666	1.19948e+06	1.49894e+06	809579	1.1395e+06	1.16188e+06	1.09138e+06	903635	885192	1.01285e+06	973263
Bradi2g13110.1	0.293304	0.72859	69735.7	118045	188598	101058	119359	112485	85435.5	63764.3	86171.9	86964
Bradi4g30710.1	0.297429	0.849571	492647	311756	312344	315327	358018	273946	271058	355180	316463	304162
Bradi3g29847.1	0.297924	0.739712	17506.5	40495.1	40158.1	42316.9	35119.1	27455.8	25660.6	24732.3	26063.5	25978
Bradi1g21550.1	0.298778	1.46664	3169.39	109438	71715.1	87729.4	68013	94104.2	109963	96474.9	98460.9	99750.8
Bradi3g39750.1	0.301616	0.744999	118926	44851.7	91397.3	80852.9	84007	65302.7	62406.4	54295.5	68335.9	62585.1
Bradi1g76177.2	0.301836	0.195032	0	49732.1	0	3762.1	13373.6	3711.03	2753.07	2588.31	1380.66	2608.27
Bradi1g50220.1	0.301837	0.60927	99006.5	60929	22356.2	72294.9	63646.6	45924.6	36524.3	42561.1	30101.9	38778
Bradi3g51680.1	0.301914	0.875067	0	79.8339	3511.51	5617.51	2302.21	3064.13	1563.39	1903.05	1527.79	2014.59
Bradi3g53260.1	0.302204	0.514165	36114.4	38245.4	6488.07	18765.8	24903.4	19294.9	10983.3	10144.3	10795.3	12804.5
Bradi2g07650.1	0.30306	0.770307	7482.08	15877.3	13685.4	15516	13140.2	13348.1	8573.49	10805.4	7761	10122
Bradi1g11150.1	0.303668	1.61495	42.4973	17391.5	29064.8	23048.3	17386.8	34644.7	28609.3	26201.1	22860.3	28078.8
Bradi3g27210.2	0.303745	0.848038	165907	206563	126021	140388	159720	110446	128254	173269	129824	135448
Bradi1g59120.1	0.304457	1.23425	107769	156309	71898.6	101638	109404	111453	104203	175952	148519	135032
Bradi2g24440.1	0.306381	1.29638	38070.8	136732	123565	124675	105761	113839	173766	141428	119392	137106
Bradi1g23770.1	0.307877	1.25119	366095	152746	95250.9	145902	189999	174589	234386	291147	250773	237723
Bradi4g00530.1	0.310707	1.20334	17079.2	40042.3	41422.1	28805	31837.1	44980.8	34723.9	38623.9	34915.3	38311
Bradi1g25697.1	0.311992	1.67284	0	5336.73	4362.83	3629.03	3332.15	5285.92	5528.77	6162.72	5319.13	5574.13
Bradi2g36980.1	0.312388	4.31249	927.403	1282.08	3570.81	680.103	1615.1	14663.5	757.752	1011.68	11427.5	6965.1
Bradi4g21200.1	0.314954	1.63926	0	2327.96	1830.07	2560.01	1679.51	2613.35	3468.07	2560.33	2370.89	2753.16
Bradi3g38310.1	0.315131	0.360293	539.434	6653.69	1516.64	930.016	2409.95	975.465	1149.23	0	1348.46	868.288
Bradi2g25410.1	0.316525	1.45108	1346.83	431012	877615	372449	420606	741836	576945	550714	571833	610332
Bradi1g65955.1	0.319832	0.0126119	0	0	4610.31	1349.56	1489.97	0	0	0	75.1652	18.7913
Bradi4g44880.1	0.32029	1.67417	0	25399.3	33411.5	25079.3	20972.5	32987.8	29726.3	41313.8	36418.7	35111.6
Bradi3g16307.1	0.325878	1.24762	129046	166504	48360.5	76733.7	105161	111910	166418	108843	137635	131201
Bradi4g09125.2	0.328958	1.51066	0	16759.2	22586.4	10391.6	12434.3	21809.3	16728.9	16821.3	19776.7	18784
Bradi2g41660.1	0.329657	1.33352	10351.7	86895.3	105228	98293.2	75192	96041.6	94258	109971	100810	100270
Bradi4g24110.1	0.329751	1.26231	31139.3	146006	128061	101836	101761	120754	122155	146856	124050	128454
Bradi3g43840.2	0.330413	1.01072	77.0166	2170.47	34.0739	3545.33	1456.72	2334.79	1798.56	787.693	968.307	1472.34
Bradi3g54020.1	0.332729	0.499853	1156.47	7140.67	5585.97	8336.67	5554.94	3373.86	3863.05	2167.16	1702.56	2776.66
Bradi3g05670.1	0.334137	1.46175	0	4679.62	3312.05	2729	2680.17	3612.45	3699.17	3938	4421.35	3917.74
Bradi4g00430.1	0.335803	1.50746	0	4084.01	3365.27	4403.95	2963.31	3100.33	5263.96	4329.44	5174.55	4467.07
Bradi2g00660.1	0.336965	1.55555	0	74271.8	3295.26	48634.4	31550.4	3506.68	57357.4	68501.3	66947.8	49078.3
Bradi2g39760.1	0.338305	1.36388	17346.6	12602.7	493.505	11164.8	10401.9	13543.7	11536.9	16926.7	14740.6	14187
Bradi2g28680.1	0.338439	1.32212	3269.04	50937.7	23184.3	54630.4	33005.4	51934.2	41240.3	31548.4	49825.6	43637.1
Bradi2g05242.1	0.339368	1.39106	788.229	69882.3	51293.7	54683.7	44162	64579.7	56230.7	50939.1	73978.3	61432
Bradi5g12070.1	0.34098	0.706467	43016.4	26568.4	13112.2	21275.4	25993.1	15816	22235.1	17563.7	17838.4	18363.3
Bradi4g04180.1	0.341277	0.618964	12415.8	7627.06	18992	4264.96	10825	8407.44	7300.01	6472.6	4620.97	6700.26
Bradi1g72640.1	0.341567	1.16272	0	8995.41	1006.83	6174.17	4044.1	6943.62	2377.23	4392.39	5095.42	4702.17
Bradi4g13400.1	0.342854	1.51493	0	130428	152892	136766	105022	197648	118339	119531	200884	159101
Bradi1g43430.1	0.343481	1.93402	0	4284.56	6692.73	3514.85	3623.03	1283.71	5588.65	8457.22	12698.6	7007.03
Bradi3g42700.1	0.34376	0.611524	7806.31	3116.05	4280.35	1591.55	4198.56	267.197	3885.5	2011.16	4106.23	2567.52
Bradi4g25750.1	0.347252	1.56711	0	3857.69	8033.11	4600.3	4122.78	12415.2	6107.69	3048.31	4272.07	6460.83
Bradi3g03040.1	0.34908	1.39279	0	8115.74	5044.78	7435.74	5149.07	7934.29	5496.17	6011.5	9244.34	7171.58
Bradi3g49380.1	0.349562	1.44424	0	27308.6	32985.6	19509.5	19950.9	24099.7	17649	29710.6	43796.4	28813.9
Bradi2g03760.1	0.349806	0.568054	972835	275880	185548	336273	442634	264456	229068	208807	303428	251440
Bradi1g12820.1	0.350128	1.37588	0	15648	13410.3	10988.6	10011.7	15854.8	12888.8	14617.7	11738.6	13775
Bradi3g14040.1	0.354618	0.00597568	0	16799.5	0	337.563	4284.27	102.406	0	0	0	25.6014
Bradi1g05180.1	0.355918	#DIV/0!	0	0	0	0	0	0	0	3072.63	0	768.157
Bradi1g05340.1	0.355918	0	27271.2	0	0	0	6817.79	0	0	0	0	0
Bradi1g60110.1	0.355918	0	0	9747.85	0	0	2436.96	0	0	0	0	0
Bradi1g21260.1	0.355918	0	13888	0	0	0	3471.99	0	0	0	0	0
Bradi4g15450.2	0.356234	1.05765	0	10537.9	1408.37	8427.47	5093.44	7305.2	5580.75	3768.22	4894.14	5387.08
Bradi2g16500.1	0.356585	0.509122	12730.4	3146.53	2091.71	2938.29	5226.74	2412.39	3049.03	2758.33	2424.43	2661.05
Bradi2g02822.1	0.356798	1.2365	0	19211.2	40609.8	14830.7	18662.9	20389.7	28919.2	24555.2	18442.3	23076.6
Bradi3g52400.1	0.358312	0.767947	156181	134166	179330	72454.3	135533	107953	99796	133262	75317.3	104082
Bradi3g55030.1	0.358604	1.28736	2488.9	110581	219851	125834	114689	153007	145117	173694	118765	147646
Bradi4g04210.1	0.35952	0.129558	0	506.693	2150.3	1264.77	980.441	0	312.081	195.682	0.335092	127.024
Bradi2g03020.1	0.35996	1.3267	0	12729.7	10911.8	10223.1	8466.14	8751.89	9548.08	14158	12470.1	11232
Bradi3g01990.1	0.360603	0.861203	927945	540247	608435	677004	688408	501233	553208	717127	599867	592859
Bradi4g05940.1	0.361897	1.3071	0	2748.41	2643.49	1520.84	1728.19	1738.34	1689.47	3092.87	2514.97	2258.91
Bradi5g21937.1	0.362741	1.23938	0	4507.27	1752.37	5504.16	2940.95	2284.62	3523.89	5475.5	3295.87	3644.97
Bradi5g07360.1	0.363455	1.18537	372963	268089	506739	209175	339241	318034	453852	477536	359091	402128
Bradi3g56060.1	0.364742	0.635392	0	18217.8	150.831	17660	9007.17	2976.43	3511.71	12943.1	3461.13	5723.09
Bradi4g05210.1	0.365092	0.12194	0	8139.98	17754.6	3432.33	7331.72	0	2924.14	0	651.988	894.032
Bradi3g59830.1	0.367131	1.07291	0	2617.18	10458.4	1682.64	3689.55	4586.56	5493.72	4229.91	1523.96	3958.54
Bradi3g04130.1	0.367446	1.24313	0	6041.31	4784.97	8332.58	4789.71	5126.4	7592.15	5565.87	5532.51	5954.23
Bradi2g53220.1	0.370431	0.256259	0	11921.1	0	7278.25	4799.84	1341.23	1566.74	1597.91	414.132	1230
Bradi3g40820.1	0.370632	1.23058	189.375	5761.72	10211	4543.79	5176.48	6058.63	6665.56	6046.68	6709.36	6370.06
Bradi3g07130.1	0.37176	1.20284	0	1299.33	2348.94	3950.23	1899.62	1599.8	2284.33	1721.87	3533.77	2284.95
Bradi1g05780.1	0.371772	0.000106478	30814.7	1.75017	0	0	7704.11	0	0	0	3.28128	0.82032
Bradi5g21350.1	0.372592	0.56397	23520.7	9485.24	9544.81	3646.49	11549.3	7125.93	5869.54	5627.07	7431.3	6513.46
Bradi1g20370.1	0.373164	1.29465	133.703	14620.7	18767.8	14238.7	11940.2	16755.3	10732.8	18196.5	16148.8	15458.4
Bradi4g29680.1	0.374967	1.5815	0	5182.91	2876.01	3197.34	2814.06	3708.25	5131.87	949.163	8012.46	4450.44
Bradi1g05150.2	0.375124	1.28778	455.278	4672.11	5557.76	4623.44	3827.15	4578.14	4653.65	4059.96	6422.27	4928.51
Bradi3g36150.1	0.376287	0.6835	19243.9	10222.3	5077.87	13725.4	12067.4	9809.56	8673.25	7164	7345.34	8248.04
Bradi2g00220.1	0.376885	0.754713	854701	732128	410124	352118	587268	375421	403521	377162	616772	443219
Bradi1g17620.1	0.376939	1.72474	0	15431.8	8030.88	18402.4	10466.3	17640.3	2094.43	28518.5	23953.2	18051.6
Bradi1g50750.1	0.378615	0.78477	4269.81	9110.51	7898.01	4914.77	6548.27	4613.88	5158.14	3324.19	7459.34	5138.89
Bradi5g10860.1	0.378643	1.03266	0	2364.53	9537.06	3200.88	3775.62	2894.64	3814.32	5311.7	3575	3898.91
Bradi3g33550.1	0.379513	1.23394	3429.44	8719.07	7471.47	7377.12	6749.27	8095.56	5578.75	10972.5	8666.05	8328.22
Bradi1g59710.1	0.379871	0.843865	0	10481.3	4936.41	659.261	4019.23	2539.06	3400.17	5623.84	2003.7	3391.69
Bradi2g18640.2	0.380267	0.195157	283.329	3690.14	219.044	0	1048.13	0	30.9632	787.237	0	204.55
Bradi1g72560.1	0.380299	1.23332	0	3548.03	1697.42	2314.31	1889.94	2858.4	1114.85	2691.39	2658.94	2330.9
Bradi1g47920.1	0.381407	1.15021	0	5307.36	2289.23	2998.09	2648.67	2178.27	3890.14	2567.86	3549.78	3046.51
Bradi1g25090.1	0.383131	1.15746	0	15046.1	15129.7	9415.12	9897.74	7962.12	11416.9	15338	11107.7	11456.2
Bradi1g39090.1	0.383285	0.932568	44423.8	0	6967.03	19194.5	17646.4	10172.3	19062.5	17668.8	18922.1	16456.4
Bradi4g08500.1	0.385994	1.38622	682290	504464	373599	611405	542939	911305	761055	328742	1.00944e+06	752635
Bradi3g04010.1	0.386306	1.16964	36164	45463.8	17539	38837.5	34501.1	48404.8	36072.9	36004.7	40933.4	40354
Bradi3g31707.1	0.386674	1.15895	0	2594.53	3953.18	2659.95	2301.92	2493.31	3066.59	1922.78	3188.52	2667.8
Bradi1g59480.1	0.388181	0.169308	0	0	0	15118	3779.49	711.841	1291.12	556.637	0	639.899
Bradi2g50760.3	0.388192	1.2564	26570.4	5324.68	8208.35	20962.8	15266.6	11857.5	17661.5	26604.4	20600.3	19180.9
Bradi1g58430.1	0.388523	0.368859	0	4216.85	0	5129.49	2336.59	1911.92	1007.69	177.197	350.68	861.869
Bradi5g12510.2	0.391068	0.860639	144487	184124	107207	188344	156040	139127	138801	142195	117055	134294
Bradi1g36820.1	0.391283	1.09031	0	17620.5	19744.4	24570.1	15483.7	17813.4	15510.6	20110.1	14094.2	16882.1
Bradi3g58830.1	0.392248	0.95988	0	11423.6	2629.95	9243.31	5824.21	6067.4	4597.01	6554.72	5143.03	5590.54
Bradi2g17040.1	0.393935	1.15943	0	3773.39	4227.25	4729.53	3182.54	3574.29	2136.98	4448.29	4600.22	3689.94
Bradi1g04140.1	0.395647	0.74684	55157.6	79652	30326.8	84830	62491.6	53527.7	46416.3	45653.7	41087.3	46671.2
Bradi5g02400.3	0.395726	0.608003	1957.72	9191.38	4034.18	8466.01	5912.32	3239.34	3959.24	4792.75	2387.51	3594.71
Bradi1g06366.1	0.396543	1.06117	0	12250.5	9460.24	13971	8920.42	10069.5	9526.63	9864.26	8403.83	9466.06
Bradi1g54560.1	0.396738	1.12443	166573	152166	105974	122220	136733	148062	136585	194703	135640	153748
Bradi5g26610.1	0.397533	0.490761	89514.2	18621.7	15369	15200.6	34676.4	21819.6	17434	16547.6	12270.1	17017.8
Bradi4g03420.1	0.398154	0.771533	12894.5	35673.4	24946.4	25499.2	24753.4	20680.5	22173.1	17699	15839.6	19098
Bradi1g18010.2	0.39842	1.03482	0	28423.2	22133.4	29735.4	20073	21762.7	18861.4	21160.9	21302.8	20772
Bradi2g08260.1	0.398501	0.587164	1312.65	16264.7	4280.24	9094.92	7738.14	7019.8	7324.32	5.18088	3824.92	4543.56
Bradi1g59110.1	0.400093	0.814174	10928.3	21225.3	23011.5	22277.8	19360.7	18138.9	14971.4	16052.1	13889.7	15763
Bradi5g10130.1	0.401165	0.616657	8.11746	5169.14	0	3080	2064.32	662.414	2390.35	1927.2	111.943	1272.97
Bradi1g05510.1	0.402576	1.01256	0	10867.8	5968.79	10854	6922.65	7476	6710.04	7263.48	6588.85	7009.59
Bradi2g08960.1	0.403034	1.03259	0	13877.1	20523.7	13269.4	11917.6	15081.6	11544.5	8819.34	13778.3	12305.9
Bradi2g03170.1	0.404554	0.902691	384877	584721	477417	510652	489417	445751	390570	524378	406470	441792
Bradi3g53350.1	0.410413	0.997866	3790.28	0	10158.7	8025.8	5493.7	3008.09	7337.12	5787.84	5794.87	5481.98
Bradi1g19660.1	0.411199	0.813296	432670	287286	201391	210969	283079	242722	200346	236590	241251	230227
Bradi3g18540.2	0.412758	0.974179	0	8797.71	4260.93	6571.61	4907.56	5674.86	4901.02	4123.23	4424.25	4780.84
Bradi4g28000.1	0.41335	1.27534	1160.24	6288.56	4200.57	5665.93	4328.82	6919.27	3452.41	7147.38	4563.84	5520.73
Bradi1g52040.1	0.414407	1.00099	0	9239.54	7127.55	10487.3	6713.59	5548.6	8298.73	7986.32	5047.17	6720.21
Bradi5g24960.1	0.416212	1.01885	0	8293.32	4747.08	7840.64	5220.26	7393.45	5820.68	2947.44	5113	5318.64
Bradi3g26400.1	0.416452	0.970793	0	5565.16	5230.35	2878.52	3418.51	3932.89	2832.5	3412.7	3096.56	3318.66
Bradi1g63010.1	0.418673	0.803698	11473.9	27038.1	16638.2	23436.3	19646.6	16489.8	16087.6	14861.9	15720.4	15789.9
Bradi3g01930.1	0.418782	1.67608	2083.28	6515.52	6123.1	3120.65	4460.64	1898.2	6577.03	10625.2	10805.1	7476.37
Bradi4g04390.1	0.418857	0.979417	0	8518.51	9806.44	11977.5	7575.62	5526.59	8504.81	9510.67	6136.68	7419.69
Bradi2g55720.1	0.420059	3.81512	539.679	0	0	1256.12	448.949	1929.55	2991.34	0	1930.28	1712.79
Bradi1g76960.1	0.42135	1.03008	3.15665	7776.79	8407.24	7101.36	5822.14	5736.36	6465.25	6968.6	4818.96	5997.29
Bradi4g26140.1	0.422473	1.00817	0	7672.49	5017.38	5802.05	4622.98	7250.53	4701.75	3690.95	2999.74	4660.74
Bradi3g14960.1	0.423484	0.596806	8292.32	50278.3	34401.2	32740.2	31428	16190.3	15158	24786.6	18890.8	18756.4
Bradi2g02420.1	0.424105	2.67586	0	747.524	416.904	333.1	374.382	2257.16	796.981	27.2497	925.787	1001.79
Bradi1g32757.1	0.428236	2.95791e-05	91507.2	0	0	0	22876.8	0	0	2.7067	0	0.676675
Bradi4g37870.1	0.428848	1.20103	2501.98	57535.3	64691.6	46726.8	42863.9	59416.2	34366	61487.7	50653.1	51480.7
Bradi4g44250.1	0.429386	1.30658	46036.5	32586.8	44568.6	19568.4	35690.1	27183.9	41206.7	77358.7	40778	46631.8
Bradi1g66620.1	0.429553	1.01789	0	1871.12	241.001	618.951	682.767	299.354	427.782	1669.23	383.564	694.982
Bradi1g54847.1	0.430944	1.12427	170935	126703	153975	90322.1	135484	171929	165308	120589	151457	152320
Bradi3g41590.1	0.431962	1.09662	114272	1880.39	83860	45204.9	61304.3	53172.2	70587	71655.1	73496.2	67227.6
Bradi2g15710.1	0.431992	0.914962	0	5956.87	4787.76	8571.08	4828.93	4621.37	5817.5	3531.32	3702.93	4418.28
Bradi3g08250.1	0.432154	0.0885426	0	4254.39	0	5316.18	2392.64	0	0	847.404	0	211.851
Bradi3g50110.1	0.432387	1.13303	536.164	16459	8217.57	13300.3	9628.27	10835	10904.2	9793.45	12103.7	10909.1
Bradi1g06430.1	0.43349	0.786126	26909.8	37286.8	67387.9	30590.6	40543.8	38528.9	31498.6	25625.4	31837.2	31872.5
Bradi1g16560.1	0.433795	1.09054	1.2924e+06	1.30511e+06	1.681e+06	1.16182e+06	1.36008e+06	1.21584e+06	1.44726e+06	1.68805e+06	1.58174e+06	1.48322e+06
Bradi1g27332.1	0.434356	40.8905	349.284	198.389	0	80.0001	156.918	13472.2	11750.1	0	443.599	6416.46
Bradi3g13100.1	0.434692	0.748398	79704.9	34628.9	27665.5	33471	43867.6	32242.7	33554.3	35181.5	30343.1	32830.4
Bradi2g53120.1	0.437581	0.527288	180056	36937.5	33732.3	34104.3	71207.6	48115.9	32977.2	33713.8	35380.6	37546.9
Bradi1g51357.1	0.43767	0.933605	0	10188.5	6816.34	7857.6	6215.61	8661.84	4869.83	3359.69	6320.34	5802.93
Bradi2g06830.1	0.43967	0.879518	67995.6	77413	58504.4	100823	76184.1	79958.2	58644	73413.6	56005.3	67005.3
Bradi1g04337.1	0.440774	1.11659	37649	17822.2	1128.07	18074.2	18668.4	18815	16922.6	26061.6	21580.2	20844.8
Bradi5g08886.1	0.442099	0.595412	297315	55910.6	115032	70282.6	134635	113528	73462	55584.9	78078.2	80163.4
Bradi3g42100.1	0.442463	0.997298	0	4738.67	549.31	1913.03	1800.25	1717.78	2311.25	257.797	2894.72	1795.39
Bradi3g41350.1	0.443216	1.14597	241796	152202	93995.8	130381	154594	199699	129481	191815	187645	177160
Bradi1g20080.1	0.443347	0.778369	55478.9	27520.7	26262.2	20618	32470	24667	22385	31475.6	22567	25273.6
Bradi4g22250.1	0.443753	0.783008	28904.5	42232.9	15100.5	26242.2	28120.1	14782.7	20363.3	27507.4	25419.6	22018.2
Bradi1g03750.1	0.443825	1.10988	220.536	13671.3	14198.4	12900.8	10247.7	10358.7	11176.2	13663.4	10296.6	11373.7
Bradi5g09217.1	0.443997	0.838276	25409	35541.8	0	27042.9	21998.4	26087.1	13747.8	13654.4	20273.7	18440.8
Bradi2g03297.1	0.444746	1.13936	2075.24	34440.4	49457.6	23608.6	27395.5	32437.5	22823.3	37020.7	32571.7	31213.3
Bradi1g73170.1	0.44488	0.866303	1011.18	11089.1	69184.4	12454.4	23434.8	18483.4	22254.6	22436.9	18031.5	20301.6
Bradi3g28300.1	0.446436	1.01566	87.5149	25851.3	17276.5	25607.8	17205.8	16802.2	17782.9	17055.2	18260.8	17475.3
Bradi2g41087.1	0.4476	0.903655	0	4664.34	1990.16	4740.41	2848.73	4552.69	2173.96	1864.11	1706.31	2574.27
Bradi4g34410.1	0.448226	1.11227	22106	34274.9	49123.8	23514.6	32254.9	40837.1	32024.2	35190.9	35452.7	35876.2
Bradi4g14950.1	0.449374	0.788176	37212.9	77849.9	36549.9	75172.6	56696.3	34833.6	34083.2	67975.4	41854.3	44686.7
Bradi2g37470.1	0.449503	0.165968	31203.1	18141.7	0	0	12336.2	815.193	1347.86	631.64	5394.95	2047.41
Bradi3g54490.1	0.451889	1.19382	953.827	8143.26	5792.17	6360	5312.31	6516.49	4352.21	6424.95	8074.13	6341.95
Bradi1g17710.1	0.457236	1.10876	212.103	3641.84	2816.04	5209.79	2969.94	3512.34	3558.2	2877.85	3223.45	3292.96
Bradi5g10380.1	0.458068	0.578891	11922.9	2616.5	2874.04	2527.09	4985.14	2547.72	3228.54	3116.61	2650.55	2885.85
Bradi2g20070.1	0.458655	0.832114	0	4497.74	9646.32	4751.99	4724.01	3410.03	3956.44	6173.41	2183.79	3930.92
Bradi2g43020.2	0.459461	2.68537	0	0	129.391	10896.1	2756.38	15594.5	13843.3	0	169.795	7401.9
Bradi4g39920.1	0.460609	0.533186	73040.1	266106	67140.1	430462	209187	76073.7	80459.4	199501	90108.4	111536
Bradi1g16750.1	0.462334	0.896421	0	3756.29	3600.49	3691.65	2762.11	4253.21	1871.29	2130.36	1649.18	2476.01
Bradi1g52460.1	0.465221	0.73797	0	1327.97	4627.29	1293.47	1812.18	835.384	1723.59	1264.5	1525.87	1337.34
Bradi4g28660.1	0.465305	1.01446	2230.05	27375.4	5021.62	28853.6	15870.2	18408.3	17733.8	13916.7	14339.9	16099.7
Bradi2g12120.1	0.466162	1.46545	5456.05	4230.83	2771.48	2051.19	3627.39	6181.02	6163.73	1676.16	7242.08	5315.75
Bradi2g04230.1	0.467969	1.11611	348631	151796	67028.3	116485	170985	185071	147758	190429	240095	190838
Bradi3g16670.1	0.469645	0.48837	14941.5	801.829	0	859.398	4150.69	2863.6	747.347	3850.62	646.724	2027.07
Bradi1g44440.1	0.470598	1.51776	2906.96	6455.29	2657.44	6626.11	4661.45	1966.21	8021.95	8722.11	9589.54	7074.95
Bradi5g22117.1	0.470724	0.689427	0	41427.5	40487.2	12165.7	23520.1	22773	11901.3	8224.68	21962.5	16215.4
Bradi1g13630.1	0.470837	0.879398	0	1955.63	2115.67	2541.16	1653.12	977.436	1603.85	971.107	2262.59	1453.75
Bradi1g52557.1	0.473165	1.04242	2439.66	7115.62	0	3881.68	3359.24	4802.96	4262.05	463.024	4478.91	3501.74
Bradi2g15560.1	0.473912	0.749396	0	4627.22	1786.14	1957.82	2092.8	1172.71	1931.54	1568.89	1600.19	1568.33
Bradi3g21330.1	0.474566	0.821157	13565.2	6119.36	9399.63	6685	8942.3	8015.39	8936.19	7420.77	4999.78	7343.03
Bradi3g40890.1	0.47531	0.830121	0	3031.4	4154.65	5540.99	3181.76	2537.85	3014.87	1208.48	3803.77	2641.24
Bradi4g37710.1	0.478573	1.01636	1883.96	613.667	12834.7	6333.72	5416.52	3905.06	4174.66	8323.58	5617.25	5505.14
Bradi1g07160.1	0.478707	0.0550982	31923.6	0	0	0	7980.91	698.827	300.879	0	759.229	439.734
Bradi1g67120.1	0.479034	0.334209	0	2366.13	374.502	2407.66	1287.07	0	0	1215.03	505.58	430.152
Bradi1g17920.1	0.480795	0.677979	0	39442.8	26015.5	30700	24039.6	13643.9	21210.8	17822.3	12516.4	16298.3
Bradi2g12510.1	0.482334	1.16221	35264.4	36578	7637.52	24124	25901	31055.3	26197.6	23105	40051.2	30102.3
Bradi3g44820.1	0.483152	0.951727	442.385	15584.4	2642.08	18251.9	9230.18	8475.04	9933.96	11915.9	4813.58	8784.61
Bradi5g09650.1	0.484498	1.06798	71969.9	54230.5	190396	32639	87309	89877.6	80053.8	102211	100836	93244.7
Bradi1g11290.1	0.485115	1.09402	2.15397e+06	981657	1.19484e+06	803949	1.2836e+06	1.36116e+06	1.32973e+06	1.55789e+06	1.36839e+06	1.40429e+06
Bradi2g50850.1	0.488123	0.158133	0	2279.68	0	301.169	645.213	0	0	408.119	0	102.03
Bradi1g04700.1	0.488753	1.22383	36826.6	6264.08	14216.6	9470.95	16694.6	37070.7	14811.5	12004.8	17838.1	20431.3
Bradi4g04200.1	0.489312	0.582887	0	8630.44	31528.7	9083.32	12310.6	9617.93	6309.67	7445.28	5329.93	7175.7
Bradi2g51150.1	0.4902	0.476711	2117.85	13701.6	28712	10574	13776.4	7533.99	4305.13	6351.14	8079.16	6567.36
Bradi2g03687.1	0.490603	1.82199	71.6899	3120.19	0	3581.41	1693.32	4275.7	10.7382	4268.45	3785.99	3085.22
Bradi1g71360.1	0.49575	0.489805	32.6796	129.557	8898.82	805.054	2466.53	1015.16	1568	398.515	1850.79	1208.12
Bradi2g59850.1	0.496413	0.570111	88258.3	39710	10453.8	39196.2	44404.6	20439.3	21505.8	29042	30274.9	25315.5
Bradi1g55280.1	0.497524	0.151901	9211.75	0	273.582	516	2500.33	0	0	518.38	1000.83	379.803
Bradi5g03410.1	0.498192	0.891968	421475	343740	409962	251161	356584	249310	356622	327931	338384	318062
Bradi1g10340.1	0.500454	0.717048	0	5064.53	4174.98	4483.39	3430.72	2424.89	3326.99	1759.38	2328.72	2459.99
Bradi1g16000.1	0.500745	0.382463	2571.17	12214.8	712.088	11434.9	6733.25	2095.72	4075.56	2672.77	1456.82	2575.22
Bradi4g34790.1	0.502599	0.277334	38362.8	3417.23	1373.08	4521.2	11918.6	4804.19	2856.77	3113.3	2447.46	3305.43
Bradi3g48790.1	0.50365	0.794888	0	1668.5	3496.5	938.595	1525.9	412.267	2316.34	1232.69	890.384	1212.92
Bradi3g27278.1	0.504258	0.665621	0	3751.52	8866.16	4605.38	4305.76	2078.07	2887.04	4218.91	2280.01	2866.01
Bradi4g34750.1	0.504535	0.99169	3280.69	60569.8	10910.1	47696.9	30614.4	36082.4	23487.6	22288.4	39581.5	30360
Bradi4g01640.1	0.506496	0.906824	88630.2	80409.2	74025.2	70760.1	78456.2	112940	85914.3	28171.5	57557.5	71145.9
Bradi3g38640.1	0.508866	2.15764	0	515.604	328.969	0	211.143	992.076	0	219.866	610.34	455.57
Bradi2g18070.1	0.511749	0.702124	0	4455.13	4083.26	5020.53	3389.73	1722.61	2056.13	3724.25	2017.06	2380.01
Bradi2g05620.1	0.512446	0.779908	0	2715.25	1695.54	3206.12	1904.23	783.261	895.799	1514.3	2747.12	1485.12
Bradi4g23695.1	0.512902	0.622017	0	2407.96	7204.57	3646.07	3314.65	1779.69	2736.68	1899.09	1831.62	2061.77
Bradi3g04790.1	0.512909	1.04423	570.37	11483.7	13487.2	13294	9708.81	11778.8	8449.2	10144.8	10179.9	10138.2
Bradi1g77770.1	0.513093	0.694318	0	3703.81	742.732	1161.7	1402.06	829.26	1895.05	390.902	778.69	973.476
Bradi2g25320.1	0.513369	0.716056	65770.8	21741.7	27426.3	18031.8	33242.7	18899.8	25182.6	25680.1	25451.9	23803.6
Bradi4g25910.1	0.517341	0.872215	178225	110498	161647	95537.6	136477	130533	116020	108340	121254	119037
Bradi2g56530.2	0.51745	0.905078	1.55856e+06	1.33644e+06	929634	1.25205e+06	1.26917e+06	1.13103e+06	1.17945e+06	929326	1.355e+06	1.1487e+06
Bradi1g04440.1	0.517551	1.08025	25879.6	35250.8	37485.9	23310.7	30481.8	28022.1	30962.8	36229.3	36497.8	32928
Bradi1g20580.1	0.51781	1.05435	3962.76	52547.6	28005.9	43352	31967.1	32686.9	34389.9	32901.8	34839.3	33704.5
Bradi2g37950.1	0.521886	1.0811	47789.8	120909	24812	88728.3	70559.8	68855.8	86798.8	77396.6	72076.5	76281.9
Bradi2g34240.1	0.522164	0.670858	41719.9	20081.3	9118.18	12145.1	20766.1	12824.8	14687.9	12866.1	15345.7	13931.1
Bradi2g05927.1	0.524085	0.675331	321749	197995	64379.7	123222	176837	89083.4	138714	132158	117738	119423
Bradi1g51670.1	0.524714	1.07683	439211	414421	640559	270899	441273	493735	462112	467170	477687	475176
Bradi3g37670.1	0.524815	0.762226	8467.11	5262.4	17090.1	6925.82	9436.35	7440.37	6438.98	7806.69	7084.47	7192.63
Bradi3g47910.1	0.527794	0.958752	122.255	6538.85	4415.53	6255.8	4333.11	3945.42	4599.61	3618.35	4454.14	4154.38
Bradi1g54200.1	0.528616	0.706563	0	11452.4	9477.91	14728.1	8914.6	11812.9	7650.7	2363.31	3367.98	6298.73
Bradi1g10150.1	0.529162	0.491762	728386	142521	84775.8	108733	266104	72285.4	167572	167201	116381	130860
Bradi4g42030.1	0.531084	0.904098	181781	169901	114604	159419	156426	100057	112029	215971	137641	141425
Bradi3g40640.1	0.531098	0.817919	3891.56	8473.25	9353.43	5153.54	6717.95	3297.82	6045.29	5673.3	6962.54	5494.74
Bradi3g18820.1	0.538359	1.21262	11933.4	6394.63	12075.8	848.724	7813.12	3340.88	13385.9	9017.27	12153.4	9474.35
Bradi5g24550.1	0.539302	1.10974	161594	279733	410246	216856	267107	284647	265071	242706	393253	296419
Bradi2g39770.1	0.540376	0.817388	0	3003.32	1440.98	2596.04	1760.09	1998.74	321.307	955.065	2479.59	1438.67
Bradi3g42800.6	0.542482	0.984489	2117.36	22086.1	4834.08	19033.1	12017.7	14371.6	12617.4	9812.92	10523.2	11831.3
Bradi2g38750.1	0.542666	0.972697	10302.5	4587.45	9364.21	8153.69	8101.96	14363.1	5755.43	584.805	10819.7	7880.75
Bradi4g45310.1	0.545235	1.0799	174067	117819	162472	100190	138637	125915	176015	144787	152138	149714
Bradi1g26350.1	0.548724	0.816129	63790.7	24119	56420.6	37733.6	45516	43583.7	23674	49101.7	32228.4	37146.9
Bradi3g05220.1	0.551246	0.86618	379259	336290	193737	401992	327820	296968	291791	251953	295091	283951
Bradi2g18330.1	0.552468	0.53077	0	46430.7	10087.2	29752.1	21567.5	6638.74	7583.12	26411.2	5156.44	11447.4
Bradi3g42060.1	0.552693	1.04118	1363.08	17144.7	11047.7	8356.96	9478.1	7521.33	12141.6	10334.6	9476.01	9868.37
Bradi4g04590.1	0.557854	0.78963	60052.7	32131.4	20373.8	24078.8	34159.2	29942.5	19150.8	27148.7	31650.5	26973.1
Bradi3g07580.1	0.557899	1.18815	9097.22	1479.3	9423.87	3661.32	5915.43	3314.45	6212.8	11803.5	6782.92	7028.42
Bradi2g60910.1	0.560783	0.489434	0	7151.49	2519.87	9463.99	4783.84	2354.62	2639.45	1621.31	2750.11	2341.37
Bradi2g17090.1	0.564318	1.07491	14200.8	29711.5	11451.5	18816.9	18545.2	18936.5	23045.7	20768	16987.4	19934.4
Bradi1g63410.1	0.565054	1.16283	0	3173.63	0	4741.94	1978.89	3424.47	2648.73	0	3131.23	2301.11
Bradi1g03820.1	0.567101	1.31215	0	3341.44	0	2710.72	1513.04	0	1150.87	3635.53	3154.9	1985.33
Bradi1g38190.1	0.567385	0.766543	0	1402.26	0	1845.94	812.05	2489.89	0	0	0	622.471
Bradi4g08430.1	0.567507	1.0854	867.98	7881.97	5811.14	6496.07	5264.29	6856.81	5251.65	3722.37	7024.62	5713.86
Bradi3g34517.1	0.572116	0.558465	0	2588.74	5834.71	3261.01	2921.12	2845.98	1335.09	1188.43	1155.87	1631.34
Bradi3g10120.1	0.573554	0.753667	47311.4	165997	165831	138269	129352	113338	86250.7	118100	72266	97488.5
Bradi5g26140.1	0.577237	0.901052	65259.3	57086.4	33328.2	48863.3	51134.3	29194.5	38954.3	35030.4	81119.5	46074.7
Bradi1g09300.2	0.5773	1.08094	7290.01	19585.1	26888.7	17912.2	17919	22975.7	18780.5	19742.6	15978.5	19369.3
Bradi4g05450.1	0.578816	0.865823	23740	20729.7	10748.9	18527.1	18436.4	15616.4	16562.6	12032.3	19639.4	15962.7
Bradi2g52790.1	0.579273	1.03285	828.374	17127.7	9133.75	10623.2	9428.24	5487.12	13846.9	10948.1	8669.58	9737.94
Bradi2g25210.1	0.58024	0.869241	91564.1	123269	59742.1	121905	99120	94976	88221.3	88238.2	73201	86159.1
Bradi5g13150.1	0.581083	1.04605	426.634	3354.74	9073.94	6261.32	4779.16	5533.41	6971.89	2167.86	5323.69	4999.21
Bradi1g61930.1	0.583259	0.869072	714026	438446	372609	339146	466057	441947	384065	418027	376108	405037
Bradi4g21690.1	0.583282	0.852807	43060.6	21847	49211.2	28089	35552	26738	39438.7	31824.1	23274.9	30319
Bradi5g14687.1	0.585633	0.773918	14493.4	6460.57	4064.38	6916.65	7983.74	4693.32	7392.14	6595.71	6033.86	6178.76
Bradi4g15750.1	0.586061	1.11014	133793	51170.1	102806	18569.9	76584.8	50044.5	69833.3	84812.8	135388	85019.7
Bradi3g55400.1	0.586993	0.932287	166.37	5573.16	3138.97	4797.88	3419.09	3257.39	3859.39	3431.57	2201.95	3187.58
Bradi3g32210.2	0.588314	0.0420509	56801.2	2192.87	0	5319.68	16078.4	445.471	734.98	1524	0	676.114
Bradi4g10920.1	0.588564	0.827061	173570	92153.5	65039.3	82269.8	103258	73235.1	101627	85115.2	81625.6	85400.7
Bradi4g37210.1	0.588655	0.860425	823.647	9907.82	31641.9	8677.41	12762.7	13771	12179.3	10448.7	7526.43	10981.3
Bradi3g03730.1	0.592619	0.820628	21419.5	7288.17	12075.9	10971.2	12938.7	9215.08	9158.52	10053	14044.9	10617.9
Bradi1g06800.1	0.59366	1.03215	90156.8	49422.4	10910.6	30514.9	45251.2	31563.2	56134.5	42185.4	56940.3	46705.9
Bradi2g26030.1	0.594622	0.19799	116650	1488.5	6960.53	12978.2	34519.3	4884.75	6907.66	8453.97	7091.54	6834.48
Bradi1g04292.1	0.596486	0.901046	635.654	23221.2	24756.4	26613.9	18806.8	21735.5	17123.6	16276.4	12647.5	16945.8
Bradi1g45710.1	0.597597	0.698297	37163.4	43918.4	8246.3	25989.2	28829.3	24927.8	12528.9	25776.6	17292.5	20131.4
Bradi3g08120.1	0.600054	1.04065	1329.88	7895.97	9948.56	8092.7	6816.78	6029.99	6409.49	7152.43	8783.74	7093.91
Bradi2g22480.1	0.600191	0.454108	0	3547.52	1797.6	6244.97	2897.52	1442.6	881.485	1548.6	1390.46	1315.79
Bradi3g30180.1	0.600509	1.08623	16405.8	30987.5	22720.5	35681.6	26448.8	35108.5	25945.9	31535.8	22327.6	28729.4
Bradi2g45460.1	0.601337	1.0578	1.98136e+06	873210	1.00652e+06	991382	1.21312e+06	1.42898e+06	1.40477e+06	1.15337e+06	1.1458e+06	1.28323e+06
Bradi1g66290.1	0.603836	0.811767	92.2907	1911.18	6038.08	2940.56	2745.53	2777.58	2153.33	2077.77	1906.23	2228.73
Bradi1g76020.1	0.604758	0.728859	41464.6	3139.82	2653.07	6727.79	13496.3	10754.5	10583.8	9244.4	8764.95	9836.91
Bradi2g46120.1	0.607037	1.03742	1.30706e+06	513056	253078	441037	628557	825469	754128	504060	524658	652079
Bradi4g44410.1	0.607391	0.980761	0	836.353	3938.84	2507.6	1820.7	0	3983.64	3159.04	0	1785.67
Bradi2g34580.1	0.607565	1.04739	41286.7	11609.1	48135.6	14245.2	28819.2	25159.4	37556.5	22501.4	35522.1	30184.9
Bradi1g37582.1	0.609601	0.543949	5098.32	42312.5	51659	51052.4	37530.6	25460.6	18728.1	18092.2	19378	20414.7
Bradi1g07237.1	0.616581	0.929128	233904	61192.7	171081	93853.1	140008	51622.6	331201	48655.4	88860.8	130085
Bradi1g55300.1	0.617008	1.03596	460.296	4101	3023.07	4021.98	2901.59	2131.24	3345.67	2506.93	4039.87	3005.93
Bradi2g05480.1	0.617473	0.613198	1508.02	11421.8	5101.26	10378.5	7102.41	3740.21	5945.96	4091.39	3643.17	4355.18
Bradi1g51210.1	0.618854	0.486725	408.302	6657.08	3913.27	6045.45	4256.02	1966.08	2647.14	1202.24	2470.59	2071.51
Bradi1g04070.1	0.619833	0.803218	1138.66	96024.6	62815.9	92131.4	63027.7	53277.2	64550.8	47796.8	36875	50624.9
Bradi2g46840.1	0.620844	0.821872	9976.96	69736	6624.35	96188	45631.3	46216.8	41326.3	28162.1	34307.2	37503.1
Bradi1g04930.1	0.621078	1.09842	859809	599752	528837	499859	622064	624109	485647	898664	724732	683288
Bradi2g47530.1	0.623365	0.619198	0	0	0	9392.15	2348.04	4338.48	0	1477.12	0	1453.9
Bradi1g34200.1	0.624232	0.887427	560.798	14752.3	7899.04	13646.8	9214.73	9391.47	7863.17	7379.39	8075.6	8177.41
Bradi3g37640.1	0.624748	0.926699	217277	172488	157135	129834	169184	153057	133873	146562	193636	156782
Bradi3g01600.1	0.625747	0.808532	1202.74	79244.2	52205.3	62826.6	48869.7	41314.3	41250	36662.7	38823.9	39512.7
Bradi1g58480.1	0.627282	0.903577	54706.9	45069.4	31540.5	31392.1	40677.3	45669.2	38125.2	26002.3	37223.5	36755
Bradi4g31830.1	0.629852	1.0532	181.389	2061.43	907.134	1860.13	1252.52	1043.3	668.424	1555.47	2009.4	1319.15
Bradi2g40490.1	0.630388	1.05081	39974.1	22081.7	35048.9	22034.6	29784.8	30696.1	34086.2	27489.2	32920.6	31298
Bradi3g27325.1	0.631382	1.0491	9.82008e+06	5.05195e+06	9.47934e+06	4.90692e+06	7.31457e+06	8.40886e+06	6.85694e+06	7.90787e+06	7.52109e+06	7.67369e+06
Bradi1g10940.1	0.631685	0.64261	258038	97342.1	38735.4	68720.9	115709	78674.3	75435.4	58659.6	84654.4	74355.9
Bradi2g37517.1	0.633421	0.250053	6879.55	94789.5	705681	89730.2	224270	16883.4	58233.3	83915.8	65285	56079.4
Bradi1g76470.1	0.63508	1.04983	761162	385585	676691	311541	533745	639583	547466	485083	569230	560341
Bradi3g08160.1	0.635624	0.806834	18740.4	40632.6	17029.6	44124.3	30131.7	24387.9	22883.9	28057.3	21916	24311.3
Bradi2g44856.1	0.635845	1.0407	1.01421e+07	4.59259e+06	1.15622e+07	3.38579e+06	7.42068e+06	5.84678e+06	8.35221e+06	8.17445e+06	8.51742e+06	7.72271e+06
Bradi3g29060.1	0.636572	0.866874	39813.1	72905.9	47817.8	89378.8	62478.9	64655.4	46224.9	50456.3	55308.8	54161.3
Bradi4g37410.1	0.637644	1.09687	325676	246755	261903	182498	254208	261122	391861	247207	215145	278834
Bradi4g39167.1	0.638416	1.12648	74154.4	49913.2	47672.1	33521.9	51315.4	32955.1	69170.9	66653.4	62444	57805.9
Bradi2g54460.2	0.639303	0.949988	13616.4	13413.8	10722.6	11410.4	12290.8	9738.33	8142.04	15692.8	13131.3	11676.1
Bradi1g35630.1	0.648146	0.375159	36358.6	20159.4	870.13	13859.3	17811.8	6721.42	5328.19	5183.15	9496.32	6682.27
Bradi1g59510.1	0.653856	0.722981	85834.3	48766.9	18507.4	25384.3	44623.2	32078.4	27375.2	25891.2	43702	32261.7
Bradi1g62500.1	0.653868	0.8041	14345.7	7829.86	4130.81	7012.01	8329.6	6803.46	7080.55	6596.17	6311.12	6697.82
Bradi2g18810.1	0.654231	0.484667	0	1876.64	1499.32	3647.49	1755.86	365.971	1218.09	470.876	1349.09	851.009
Bradi2g12680.1	0.655165	0.783111	2680.05	12544	4304.01	12419.1	7986.8	1448.28	5926.6	11685.9	5957.4	6254.55
Bradi1g17200.1	0.656188	0.122377	0	7277.48	816.531	11925.5	5004.88	0	1383.32	824.303	242.304	612.482
Bradi3g09210.1	0.658319	0.428176	0	6394.89	44.367	4371.97	2702.81	2264.68	2364.43	0	0	1157.28
Bradi4g33490.1	0.660206	0.915523	860.698	13074.6	13213.2	11888.8	9759.33	9618.93	7160.57	9740.64	9219.45	8934.9
Bradi4g00517.1	0.66508	0.93376	244829	256068	167541	178020	211615	195336	189009	171374	234670	197597
Bradi2g56030.1	0.668544	0.93001	79190.9	56489.5	57016.1	45838.3	59633.7	40808.5	69001.4	63432.4	48597.3	55459.9
Bradi1g51570.1	0.668954	0.873646	2006.82	28656.5	24420.8	44573.9	24914.5	24612.1	19602.4	22452	20399.3	21766.5
Bradi1g73910.1	0.669	0.480726	0	2505.02	1366.87	1522.79	1348.67	679.904	519.49	267.467	1126.51	648.342
Bradi1g75620.1	0.671681	0.846006	53296.9	35219.8	16407.9	35002.2	34981.7	30563.3	23240	19578.8	44996.9	29594.7
Bradi2g47760.1	0.674327	0.513185	0	12382.3	0	8751.7	5283.5	4394.27	1488.22	4963.17	0	2711.42
Bradi1g26850.1	0.676951	0.770588	113026	26510.2	47081.2	45314.6	57983	37871.4	43346.4	61771.5	35734.6	44681
Bradi3g39790.1	0.677689	1.0599	203219	127708	152049	112790	148942	151279	130685	203494	145996	157864
Bradi2g21120.1	0.678764	1.03578	573646	339544	501412	243411	414503	438445	465533	433472	379877	429332
Bradi1g36260.1	0.688584	0.878774	1.17557e+06	646410	1.07157e+06	549378	860733	791184	685827	746246	802303	756390
Bradi2g34450.1	0.688952	1.04136	22128.3	13350.7	15703.1	13923.7	16276.5	14662.3	17050.3	19901.3	16184.8	16949.7
Bradi1g06360.1	0.689391	1.07908	1623.38	7726.66	4003.67	2460.55	3953.57	4599.68	2167.11	6546.18	3751.92	4266.22
Bradi1g52200.1	0.691397	1.03564	365510	234768	156768	194553	237900	212670	229776	260690	282378	246379
Bradi3g39997.1	0.691675	0.545071	4449.57	6587.34	311.854	5170.99	4129.94	3539.46	2639.63	572.46	2252.88	2251.11
Bradi3g04567.1	0.693605	0.010219	0	0	8900.06	0	2225.02	0	0	0	90.9499	22.7375
Bradi1g10490.1	0.69641	0.354889	0	14910.7	3706.47	13011.2	7907.1	5843.06	760.536	2968.77	1652.19	2806.14
Bradi1g50280.1	0.699829	0.969719	918798	881678	746961	906938	863594	725331	788741	1.03193e+06	803771	837443
Bradi3g39630.1	0.704711	0.344226	0	1084.08	1629.96	962.629	919.166	0	710.377	468.669	86.5562	316.401
Bradi1g74922.1	0.707705	1.06022	11247.3	15019.7	9747.64	17724.4	13434.7	10050.4	16003.4	15417.5	15503.7	14243.8
Bradi1g06372.1	0.708825	0.992899	4897.92	3039.9	2012.84	2833.76	3196.1	6188.74	3539.85	1954.76	1010.29	3173.41
Bradi1g02640.1	0.711114	0.851333	1539.87	7814.76	481.981	4943.42	3695.01	4787.61	2328.46	76.1392	5390.52	3145.68
Bradi3g00660.1	0.712754	2.96962	0	0	562.292	135.364	174.414	2071.78	0	0	0	517.944
Bradi4g37090.1	0.718826	0.935724	111486	77506.4	63209.5	74874.4	81769	76612	76059.7	58955.6	94425.5	76513.2
Bradi2g13082.1	0.721435	0.864775	1.86163e+06	735646	845116	697063	1.03486e+06	1.13904e+06	1.22264e+06	610507	607522	894925
Bradi2g39690.1	0.726036	0.320109	0	15903.7	35348.7	25947.8	19300	15575.6	3965.29	2280.87	2890.72	6178.11
Bradi2g24430.1	0.728817	1.03539	21804.7	51146.9	38434.4	36120.7	36876.7	36177.2	32355.4	46653.2	37541.1	38181.7
Bradi4g24367.1	0.729909	1.02307	1.056e+06	756970	1.2075e+06	560033	895125	993212	891694	837938	940249	915773
Bradi1g08120.1	0.730274	0.231273	6766.92	18692.8	0	9392.12	8712.97	3056.21	4195.09	0	809.007	2015.08
Bradi2g23110.1	0.73377	0.947456	6198.52	37191.1	40091.8	34676.2	29539.4	25485.7	28521.7	27892.7	30049	27987.3
Bradi5g20650.1	0.737318	0.2927	0	2211.9	1371.58	1840.17	1355.91	770.152	400.048	0	417.301	396.875
Bradi3g56270.1	0.738828	1.71155	5019.43	1636.08	770.569	2565.08	2497.79	8567.58	3271.45	360.244	4901.1	4275.09
Bradi3g35370.1	0.738971	0.895901	3.0996e+06	1.74206e+06	2.03623e+06	1.26908e+06	2.03674e+06	1.6417e+06	1.92197e+06	2.32568e+06	1.40953e+06	1.82472e+06
Bradi1g29520.1	0.742334	0.51464	20.2135	11200.1	8064.68	10163.8	7362.2	4742.86	4708.62	3849.1	1854.94	3788.88
Bradi1g02560.1	0.742526	0.86862	50294	23417.1	19024.3	25209.4	29486.2	26977.6	26593.3	29051.3	19827.1	25612.3
Bradi1g45833.1	0.742989	1.01881	25533.9	13484.5	49618.9	8197.11	24208.6	13383.1	41652.3	24064.3	19555.8	24663.9
Bradi4g00940.1	0.745508	0.581259	51.1931	11998.6	9326.48	9561.21	7734.38	4367.21	4347.75	6554.36	2713.38	4495.68
Bradi2g17670.1	0.747832	0.974068	1669.37	7673.64	10110.2	7723.9	6794.27	7697.9	7166.75	7022.06	4585.61	6618.08
Bradi2g35850.1	0.748659	0.230362	0	3181.7	274.224	3594.55	1762.62	0.00482388	821.864	647.176	155.115	406.04
Bradi1g13670.1	0.749811	0.927769	112581	176676	221206	179910	172593	148399	152092	186028	153987	160127
Bradi1g33210.1	0.75109	0.985392	23996	11987.7	6837.19	6264.46	12271.4	9957.33	14259.8	8900.96	15250.3	12092.1
Bradi1g59870.1	0.752038	0.919015	551675	293960	318371	304705	367178	317644	317498	381069	333557	337442
Bradi2g41640.1	0.754261	1.03047	32547.7	62960.2	37662.5	56231.8	47350.5	59332.6	42578.2	43195.8	50067.2	48793.5
Bradi3g16530.1	0.754909	0.716187	417317	257312	61505.9	201559	234423	163554	141741	182089	184180	167891
Bradi2g17272.1	0.757098	0.940389	166956	120195	108092	94140.5	122346	96954.8	127274	129614	106368	115053
Bradi3g18600.1	0.759547	1.00815	123768	123315	43485	97425.6	96998.4	107985	86126.6	107103	89943.6	97789.4
Bradi1g32420.1	0.760257	0.908998	575758	172958	111603	153708	253507	187673	259407	253571	221098	230437
Bradi2g17290.1	0.763754	0.201799	901.854	1029.22	647.174	32060.3	8659.64	1413.09	3158.99	799.476	1618.45	1747.5
Bradi3g02340.1	0.763794	1.02472	10007.8	11201.2	23327.2	22037.9	16643.5	20742.1	18335.7	12271.9	16869.7	17054.9
Bradi1g12117.1	0.764121	0.140997	3496.65	348.31	20477	0	6080.48	899.205	0	284.336	2245.79	857.332
Bradi1g05670.1	0.765393	1.04696	18036.9	22507.2	16922.1	30481.3	21986.9	30190.4	23857.6	18339	19690.2	23019.3
Bradi2g11510.1	0.76846	0.474366	4089.45	59271	195278	60847.6	79871.4	8855.81	38448.2	52948.4	51300.7	37888.3
Bradi4g41680.1	0.770729	0.787254	2001.64	24361.3	5537.58	21426.2	13331.7	11539.2	9409.07	9916.77	11116.7	10495.4
Bradi1g73770.1	0.773775	0.611603	138744	21361.8	79490.8	17757	64338.5	35311.1	31819.1	49758.4	40510	39349.6
Bradi1g52567.1	0.775224	0.378952	0	2023.2	3032.13	1463.56	1629.72	0	309.991	1426.97	733.387	617.587
Bradi3g49570.1	0.779104	3.17897	0	1332.23	2974.9	1310.85	1404.5	5963.04	0	7292.87	4603.46	4464.84
Bradi5g08455.1	0.779823	0.277743	1115.76	6782.27	0	4321.73	3054.94	1117.18	543.646	0	1733.12	848.488
Bradi4g04220.1	0.781136	0.990579	2.25934e+06	950974	1.04809e+06	795790	1.26355e+06	1.05733e+06	1.20216e+06	1.23529e+06	1.51181e+06	1.25165e+06
Bradi1g44460.1	0.78135	0.486604	1427.78	24883	5138.46	24339.2	13947.1	5465.66	7467.93	8537.25	5676.07	6786.73
Bradi1g34170.2	0.784161	0.922776	542327	564347	291570	569859	492026	424330	437909	427725	526152	454029
Bradi2g57150.1	0.785078	1.37456	0	2807.49	70.5114	1797.71	1168.93	0	2406.82	2255	1765.21	1606.76
Bradi1g69550.1	0.786033	0.855439	375279	252091	116004	166582	227489	140983	195795	199591	242043	194603
Bradi1g06520.1	0.787693	0.652008	3317.71	29228.8	29139.1	23672.2	21339.4	15053	11658.2	14503.6	14439.3	13913.5
Bradi2g01827.1	0.789228	0.116347	0	645.315	3.96895	6324.87	1743.54	228.469	7.17606	398.851	176.926	202.856
Bradi1g18710.1	0.793235	1.01596	205691	157433	136684	176420	169057	178575	163541	184225	160675	171754
Bradi2g11920.1	0.794458	0.243185	0	12341.3	7408.87	9442.18	7298.08	1135.81	880.137	2424.77	2658.41	1774.78
Bradi3g54320.1	0.797327	0.888362	21149.6	168486	70135.1	77760.3	84382.7	63955.6	84094.7	79136.5	72662.9	74962.4
Bradi1g61230.2	0.798477	0.00491769	243841	470.755	2.54517	156.576	61117.7	562.723	161.679	109.958	367.871	300.558
Bradi2g27267.1	0.802471	1.01235	11524.7	6167.1	10027.2	4239.98	7989.76	5979.01	7188.34	9468.49	9717.73	8088.39
Bradi1g17236.1	0.804226	0.670449	104.269	16522.5	9203.85	10132.3	8990.72	11977.8	6445.83	2101.76	3585.89	6027.81
Bradi3g47340.1	0.808481	0.96019	618167	410434	462068	387978	469662	395079	474336	540144	394298	450964
Bradi2g16560.1	0.810101	0.980963	2.36525e+06	947842	836235	776772	1.23153e+06	932007	983348	1.37324e+06	1.54374e+06	1.20808e+06
Bradi2g12020.1	0.814544	1.01159	80683	75223.6	43220.2	58644.8	64442.9	72301.3	61127.8	68529.4	58799.6	65189.5
Bradi3g39590.1	0.814662	0.862675	99227.5	76884.8	27860	86102.6	72518.7	54601.5	80901.6	40243	74494.2	62560.1
Bradi4g34420.1	0.817066	0.961588	508546	237929	152395	171248	267529	305722	207647	228522	287121	257253
Bradi4g41850.1	0.819563	0.880645	78198	35151.5	80408.4	23429.2	54296.8	28513.6	27195.5	73340.6	62214.9	47816.2
Bradi1g06860.1	0.821776	0.887044	2.02151e+06	1.57485e+06	739474	1.8122e+06	1.53701e+06	1.47076e+06	1.35765e+06	1.28586e+06	1.3393e+06	1.36339e+06
Bradi2g48070.1	0.821966	0.677361	678.917	5716.84	3413.5	5689.42	3874.67	2342.77	2934.88	2559.38	2661.17	2624.55
Bradi1g14010.1	0.822602	0.0707188	0	5005.76	0	0	1251.44	0	354.001	0	0	88.5004
Bradi4g28057.1	0.823827	0.362043	3161.49	134498	12846.2	108973	64869.6	33568.1	26634.1	17279.6	16460.7	23485.6
Bradi1g76630.1	0.824377	0.868436	46065.7	37260.9	6004.86	20394.1	27431.4	23266.2	23102.7	25043.5	23877.3	23822.4
Bradi1g23520.1	0.826759	0.639586	8093.49	72515.4	17318.5	59205.3	39283.2	26920.3	29340.4	17545.1	26694.2	25125
Bradi2g23120.1	0.827448	0.991345	105610	34802.1	86328.6	45489.5	68057.6	55175.8	94404.4	56915.2	63378.8	67468.5
Bradi4g28270.1	0.838633	1.08916	11961.9	8640.63	18829.2	11786	12804.4	14742.5	28080.2	4726.72	8235.1	13946.1
Bradi1g24850.1	0.838961	1.01392	28930.7	11579.7	15076.2	10667.1	16563.4	16010	13585.6	25134.9	12445.6	16794
Bradi3g55850.1	0.840589	1.10924	733868	618122	259233	807942	604791	498612	691455	1.17051e+06	322850	670856
Bradi5g22820.1	0.842311	0.214174	0	4290.13	0	3667.7	1989.46	247.163	1052.68	0	404.516	426.091
Bradi5g07880.1	0.844519	0.878058	4212.81	28699.8	22913.2	26953	20694.7	18188.7	17434.2	19269.2	17792.5	18171.2
Bradi1g07170.1	0.846514	0.958309	84596.5	58395.6	75591.7	44935	65879.7	87815	51843.5	52208.9	60665	63133.1
Bradi1g13290.1	0.850303	0.948608	15858.4	31951.3	6707.38	21781.1	19074.5	19531.9	15573.7	13583.2	23688.2	18094.3
Bradi3g16180.2	0.855913	0.552174	17428	19474.5	184.399	15243.1	13082.5	9693.68	8618.83	4458.4	6124.31	7223.81
Bradi2g41180.1	0.857806	0.926484	319107	179969	135744	159118	198484	142859	162120	245181	185410	183893
Bradi3g34980.1	0.858583	0.940637	3001.93	6564.94	11312.9	4426.63	6326.6	5391.26	6920.17	6185.48	5307.22	5951.03
Bradi3g33950.1	0.864428	0.991528	95652.9	78578.6	49504.8	46625.5	67590.4	62833.3	59363.7	69019.9	76854.3	67017.8
Bradi5g27670.1	0.864973	0.856218	25536.3	8276.16	7181.22	9787.09	12695.2	6335.26	11368.6	14841.6	10934	10869.9
Bradi2g16430.1	0.865956	0.952278	8560.1	36220.5	26698.3	32908.3	26096.8	25278.8	18930.8	22020.4	33175.6	24851.4
Bradi1g22830.1	0.867218	0.954257	4.05327e+06	1.35882e+06	3.97649e+06	1.56591e+06	2.73862e+06	3.05634e+06	2.54934e+06	3.03877e+06	1.80894e+06	2.61335e+06
Bradi5g15360.1	0.872995	0.940633	41638.6	33776.5	63758.4	15334.9	38627.1	41830.3	37745.5	36309.9	29450	36333.9
Bradi3g48190.1	0.874295	0.155112	0	0	0	3520.13	880.032	546.013	0	0	0	136.503
Bradi2g01430.1	0.881707	0.899811	8058.59	47203.4	18708.1	31003.9	26243.5	28938.3	27509.3	16630.7	21378.4	23614.2
Bradi3g35680.1	0.881819	0.254575	132.43	47798.4	16121.7	75310.4	34840.7	6411.03	6101.9	18830.5	4134.86	8869.56
Bradi2g56020.3	0.882211	0.962563	144030	47211.3	47274.3	77056.8	78893	57386.1	151558	46220.1	48593.8	75939.5
Bradi2g02000.1	0.884525	0.872396	1448.41	6294.46	8805.9	9025.28	6393.51	5134.3	6218.71	6132.48	4825.19	5577.67
Bradi3g32330.1	0.893316	0.99358	578398	367964	396041	296291	409673	369853	382155	427492	448672	407043
Bradi3g46480.1	0.903682	0.829686	49454	27014.1	54020.8	11500	35497.2	20516	32610.5	27737.5	36942.2	29451.6
Bradi5g16730.1	0.905619	0.688496	12405	2562.39	1537.27	3328.43	4958.26	3158.35	2806.31	4190.38	3499.93	3413.74
Bradi2g57330.1	0.906494	6.00275	0	53.1679	1490.5	311.851	463.88	5241	3.39739	0	5893.83	2784.56
Bradi1g60730.1	0.906798	0.769011	8479.72	91500.6	95718	86345	70510.8	57036.1	49645	57953.6	52259.5	54223.6
Bradi1g06220.2	0.908635	0.856764	9160.38	63140.4	40567.3	53767.6	41658.9	41023.3	33882	28830.5	39031.7	35691.9
Bradi1g12190.1	0.910706	0.748386	20570.5	12462.8	2400.86	16942.8	13094.2	12663.7	8664.81	6706.5	11163.1	9799.54
Bradi1g19730.1	0.914017	0.969344	649511	293500	628026	332638	475919	560633	445344	427308	412032	461329
Bradi4g26270.1	0.914728	0.527613	0	4382.86	0	4571.39	2238.56	3587.7	0	1136.68	0	1181.09
Bradi2g04180.2	0.918343	0.666203	5247.36	283.471	3068.14	35.1689	2158.53	167.42	328.225	329.195	4927.25	1438.02
Bradi4g31310.1	0.925378	0.430567	143.22	13985.5	5227.26	9781.28	7284.32	2015.18	2251.48	2614.22	5664.68	3136.39
Bradi1g56270.1	0.925576	0.888806	83014	52203.3	23538.8	40090.6	49711.7	40702.4	42107.1	54763.3	39163.4	44184.1
Bradi1g49650.1	0.927788	0.952292	1535.53	45493	50833.2	9261.18	26780.7	14708.7	2865.71	67203	17234.8	25503.1
Bradi1g42000.1	0.936054	0.251285	0	7691.3	0	342.184	2008.37	1375.32	0	0	643.372	504.674
Bradi1g67270.1	0.936473	0.968893	182508	181254	348881	163980	219156	185038	218888	225876	219552	212338
Bradi1g75290.1	0.936697	0.527299	7282.21	212369	152319	285289	164315	75844.3	68898.8	123504	78325.2	86643
Bradi3g10350.1	0.937177	0.920083	4789.48	12422	21878.4	13044.9	13033.7	10135.8	15032.6	9076.55	13723.3	11992.1
Bradi1g20670.1	0.937253	0.858229	1524.73	9657.07	12433.1	7846.97	7865.48	9561.96	4902.68	8022.39	4514.49	6750.38
Bradi5g12330.1	0.938693	0.962905	1.40854e+06	793846	1.1599e+06	789033	1.03783e+06	1.16243e+06	1.04365e+06	908895	882355	999333
Bradi1g13232.1	0.939364	0.944487	4178.11	6554.8	11871.6	3896.56	6625.26	4356.15	6280.56	8225.2	6167.95	6257.47
Bradi1g77560.1	0.943939	0.803272	1.03935e+06	387060	188544	320230	483797	358974	309896	448319	437294	388621
Bradi3g29087.1	0.946227	0.935363	1610.22	3860.08	3871.1	3575.33	3229.18	3618.51	3038.82	2819.68	2604.82	3020.46
Bradi3g14570.1	0.947433	0.968193	25406.5	13991.7	14546.7	10348.9	16073.5	15889.4	12970.8	18738.6	14650	15562.2
Bradi3g36480.2	0.950632	1.00673	511091	409174	399113	364964	421085	358530	351231	591805	394114	423920
Bradi2g31990.1	0.951294	0.99002	32249.3	35103.5	40641.3	26672.9	33666.8	41278.3	29990.8	30709.5	31344.4	33330.8
Bradi1g59620.1	0.952279	0.735956	373.151	4830.18	6023.64	5009.28	4059.06	2367.85	4797.7	2196.64	2586.98	2987.29
Bradi4g41000.1	0.95498	0.839055	12535.9	1475.62	1978.45	5733.72	5430.93	2510.72	3603.93	2872.94	9239.81	4556.85
Bradi3g56630.2	0.961035	0.941733	26682.1	12371.9	14361.2	10601.9	16004.3	20359.2	12958.8	13466	13503	15071.7
Bradi3g08680.1	0.969066	0.75224	1255.87	8299.59	11673.4	6036.85	6816.42	4878.9	4431.23	5531.16	5669.05	5127.59
Bradi4g01200.2	0.971612	0.950237	409744	826951	409435	817317	615862	616586	589299	424689	710283	585214
Bradi3g58240.1	0.980767	0.475342	153.853	7522.83	3218.12	9229.33	5031.03	2149.8	1939.05	2803.53	2673.46	2391.46
Bradi3g08200.1	0.988186	0.298081	17634.1	587.022	0	192.874	4603.5	0	325.452	3829.18	1334.21	1372.21
Bradi4g24610.1	0.996568	0.877225	6448.63	28295.4	15328.5	26520.2	19148.2	11667.7	19439.4	18788.8	17293.2	16797.3
Bradi2g02600.1	0.99892	0.949296	121480	56277.2	102305	56816.8	84219.8	90644.3	80440.2	83598.3	65115.4	79949.6

## Sheet: p<0.05,>1.5 fold downregulated
				NA					CA 2 days
Bradi no.	Anova (p)	Fold Change	Max Fold Change (1/Fold Change)	Experiment 1	Experiment 2	Experiment 3	Experiment 4	Average	Experiment 1	Experiment 2	Experiment 3	Experiment 4	Average
Bradi1g11670.1	2.72e-05	0.214261	4.66721	42964.7	72729.3	62903.1	73240.8	62959.5	13203.1	15336.4	12327.5	13091.9	13489.7
Bradi5g15970.1	8.64e-05	0.377613	2.64821	961138	975383	1.2495e+06	962730	1.03719e+06	419932	313556	460241	372897	391656
Bradi3g49360.1	8.71e-05	0.306114	3.26675	1.60053e+06	981489	1.09713e+06	950086	1.15731e+06	361453	320243	379598	355783	354269
Bradi1g28760.1	9.14e-05	0.48339	2.06872	7.16922e+06	5.63367e+06	5.1579e+06	5.4289e+06	5.84742e+06	2.90867e+06	3.00356e+06	2.67101e+06	2.72309e+06	2.82658e+06
Bradi2g45580.1	0.000138142	0.399568	2.5027	622415	633090	428218	658316	585510	238566	225819	253397	218022	233951
Bradi1g31690.1	0.000205113	0.348399	2.87027	136005	179519	136360	175949	156958	58295.7	62806.1	39016.3	58618.1	54684.1
Bradi1g11440.1	0.000242385	0.569795	1.75502	107196	111131	117399	108963	111172	54109.5	71207	57387.7	70677.1	63345.4
Bradi1g67960.1	0.000248724	0.34039	2.93781	623220	484582	347884	570885	506643	193288	166392	154138	176006	172456
Bradi3g42030.1	0.000374359	0.20986	4.76508	20147.1	36069.9	18036.9	39236.5	28372.6	4895.02	5728.55	6372.37	6821.2	5954.28
Bradi2g14400.1	0.000392715	0.402404	2.48507	202307	300672	195123	283242	245336	115795	92839.5	88405.4	97856.6	98724.1
Bradi3g56020.1	0.000432085	0.516905	1.93459	1.13343e+06	953557	1.36634e+06	1.00378e+06	1.11428e+06	528749	622192	525831	627130	575976
Bradi4g31330.1	0.000812467	0.241144	4.14691	59843.4	34387.1	22611.1	50325.2	41791.7	9351.99	9596.48	10704.5	10658.2	10077.8
Bradi1g04860.1	0.00101057	0.465968	2.14607	32277	27868	20322.9	20608.2	25269	10883.1	12919.7	10556.1	12739.3	11774.5
Bradi5g23660.1	0.00119249	0.424226	2.35723	108675	123183	105547	170372	126944	69091.8	48609.3	43302.5	54408.6	53853.1
Bradi2g33060.1	0.00119639	0.184275	5.42667	22994.4	13452.4	6847.31	15233.9	14632	2633.16	2874.44	1853.42	3424.22	2696.31
Bradi1g44630.1	0.001238	0.419133	2.38588	145514	106061	80860.5	109393	110457	55623.1	36429.1	49430.3	43702.2	46296.2
Bradi2g42100.1	0.00143643	0.512652	1.95064	77704.6	63159.3	57772.7	85198.2	70958.7	43348	35805.8	36879.4	29475.1	36377.1
Bradi2g14900.1	0.001653	0.149628	6.68326	25180	10888.6	5707.64	10720.5	13124.2	2609.97	2077.74	1459.08	1708.17	1963.74
Bradi3g42340.1	0.00192665	0.329133	3.03828	65079.6	36111.1	46399.8	30733.8	44581.1	20262.1	14980	11984.5	11465.9	14673.1
Bradi4g37350.1	0.00225865	0.606063	1.64999	516596	363978	399208	455499	433820	293299	222347	280048	255994	262922
Bradi1g39167.1	0.00247108	0.54127	1.84751	78286.1	123081	96661.9	105823	100963	49845.1	64038.3	45664.8	59045.1	54648.3
Bradi1g26770.1	0.00270795	0.240035	4.16606	21270.7	23441.9	10236.5	17128.2	18019.3	5462.39	2206.61	3517.07	6114.99	4325.27
Bradi3g53520.1	0.00291727	0.224906	4.44631	317659	169390	85070.7	216654	197193	50870.8	49159.8	41971.8	35397.1	44349.9
Bradi1g11680.1	0.00294124	0.442902	2.25784	1.79046e+06	1.67358e+06	1.02234e+06	2.03388e+06	1.63006e+06	625655	700431	853780	707970	721959
Bradi1g25220.1	0.00316999	0.224187	4.46057	88296.9	31896	24897.7	32340.6	44357.8	12052.9	9212.02	9239.97	9272.85	9944.44
Bradi3g01210.1	0.00355215	0.657912	1.51996	28808.1	32996.6	23109.8	31675.7	29147.5	19582.6	18485.1	21090.8	17547.5	19176.5
Bradi2g48570.1	0.00384723	0.161887	6.17713	37043	17177.6	8380.76	16267.8	19717.3	3451.38	3700.36	1481.9	4134.3	3191.98
Bradi1g46670.1	0.00385118	0.359328	2.78298	108921	66313.8	42532.5	79104.5	74218	25265.3	33431.2	21911.1	26066.7	26668.6
Bradi1g15050.1	0.00416534	0.283731	3.52446	42973.7	32445.4	15155.5	40442.7	32754.3	9613.32	10108.8	6390.83	11060.7	9293.43
Bradi2g37480.1	0.00433135	0.485456	2.05992	102461	70564.9	58933	71540.2	75874.7	32667.8	39636.8	47056.7	27974.2	36833.9
Bradi3g35660.1	0.00462531	0.432598	2.31162	83781.5	72442.1	42991.9	94220.3	73358.9	32542.1	35628.6	31894.9	26874.1	31734.9
Bradi4g38430.1	0.00463512	0.65117	1.5357	213295	188985	168055	181102	187859	117253	100913	152842	118306	122328
Bradi5g18170.1	0.00510762	0.369457	2.70667	736452	292583	329697	353796	428132	154605	178562	137000	162538	158176
Bradi1g25440.1	0.00541781	0.205922	4.8562	323751	405104	129672	580291	359704	79451	58256.8	56876.7	101700	74071.1
Bradi5g16740.1	0.00569686	0.264242	3.78441	39901	14693.9	14495.2	18594.3	21921.1	7593.64	3464.12	7546.65	4565.5	5792.47
Bradi2g26760.1	0.00613961	0.486257	2.05652	262929	186238	165789	220432	208847	76423.7	80936.9	146905	101948	101553
Bradi1g10630.1	0.00640912	0.387877	2.57813	7149.24	6355.35	2978.84	6292.34	5693.94	2187.44	1907.15	1893.27	2846.35	2208.55
Bradi3g35700.1	0.00690669	0.224881	4.4468	134892	221262	152899	405678	228683	24177.3	45971.8	96196.8	39359.7	51426.4
Bradi3g14340.1	0.00779202	0.581336	1.72018	902738	620215	505040	678781	676694	459319	347126	389111	377990	393386
Bradi4g38510.1	0.00921036	0.419664	2.38286	37403.6	19780.4	17912.4	16581.1	22919.4	7823.47	13039.2	7938.07	9673	9618.43
Bradi2g03460.1	0.00944367	0.345036	2.89825	480281	219041	156602	204269	265048	84813.2	73867	120191	86933.3	91451.1
Bradi2g61560.1	0.0103047	0.487599	2.05087	121778	53830.1	64178.1	79908.8	79923.7	41464.5	42958.4	36397.7	35062	38970.7
Bradi1g67517.1	0.010463	0.388404	2.57464	39396.5	26700.8	13504.9	23221.7	25706	10540	7766.24	12387.1	9243.83	9984.31
Bradi1g75520.1	0.0104883	0.45609	2.19255	2370.84	5443.85	3207.59	4966.18	3997.12	1748.52	1841.14	1634.77	2067.76	1823.05
Bradi1g54680.1	0.0116484	0.642269	1.55698	10376.8	12732.8	14420.1	10840.7	12092.6	7252.12	8900.49	9010.74	5903.46	7766.7
Bradi3g08900.1	0.0132122	0.526589	1.89901	249673	145113	120743	136304	162958	77545.8	78985.7	82717.2	103999	85812
Bradi1g10480.1	0.0152755	0.503212	1.98724	132663	252784	157877	269132	203114	100710	101233	125149	81745.7	102209
Bradi3g59520.1	0.0165143	0.649346	1.54001	17707.8	17362.8	10873	15838.2	15445.5	9869.27	10628.3	11068.2	8552.04	10029.5
Bradi3g36930.1	0.0169652	0.592058	1.68902	627363	567463	349100	599559	535871	364272	272705	281387	350704	317267
Bradi4g26877.1	0.0170912	0.103	9.70869	14676.9	2527.5	5261.18	9023.29	7872.21	0	3243.37	0	0	810.842
Bradi2g56347.1	0.0187805	0.114083	8.76553	4189.47	35943.9	15858.7	50199.6	26547.9	2554.67	1792.03	4544.1	3223.9	3028.67
Bradi1g34750.1	0.019184	0.582973	1.71535	8827.2	9066.08	9954.5	7449.68	8824.37	5114.91	3454.7	7768.1	4239.75	5144.36
Bradi1g47767.1	0.0204776	0.243142	4.11283	322901	83432.1	77354.7	95582.2	144817	31754.7	43463.4	49009.6	16616.9	35211.1
Bradi1g04660.1	0.0210033	0.492083	2.03218	99770	69086.8	37548.4	58857.5	66315.7	30344.8	33176.7	37959.7	29050.1	32632.8
Bradi2g50500.1	0.0213953	0.236358	4.23087	25010.5	5424.13	5662.97	5864.67	10490.6	3377.2	1823.72	2113.71	2603.48	2479.53
Bradi2g09950.1	0.0235304	0.668332	1.49626	28496.3	17509.5	20082	22821.6	22227.3	17842.6	15627.5	12278.7	13672.2	14855.2
Bradi3g39740.1	0.0240723	0.425057	2.35262	188872	117881	61639.1	79490.2	111971	59591.9	45905	45072.6	39806.4	47594
Bradi1g05980.1	0.0244708	0	0	0	4594.49	1930.22	5226.32	2937.76	0	0	0	0	0
Bradi1g78470.1	0.0249514	0.210163	4.7582	22994.1	13693	8878.28	12521	14521.6	5096.23	5970.26	495.453	645.692	3051.91
Bradi3g41150.1	0.0267413	0.619375	1.61453	174796	109587	100517	114484	124846	74199.8	79224.9	58636.1	97245.7	77326.6
Bradi2g01610.1	0.0271849	0.338297	2.95598	22789.5	19235.1	5580.31	11582.3	14796.8	6497.73	5258.29	4053.98	4212.87	5005.72
Bradi1g18550.2	0.027929	0.522207	1.91495	213603	91748.1	107818	106562	129933	61441.7	61179.6	61010.2	87775.5	67851.7
Bradi4g13640.3	0.0279854	0.519571	1.92467	37980.9	24198.6	14414.9	21003.2	24399.4	14732.7	12455.5	12251.3	11269.4	12677.2
Bradi5g11340.1	0.0280143	0.0813604	12.291	866.526	6002.83	2736.69	13987.3	5898.33	1033.55	236.423	51.4357	598.15	479.89
Bradi3g15050.1	0.0289032	0.65705	1.52195	100126	172990	111473	97952.3	120635	70923.3	80362.9	81853.1	83914.3	79263.4
Bradi3g43560.1	0.0300052	0.415088	2.40913	89391.3	43620.5	28666.4	37591.5	49817.4	27374	14691.8	15643.6	25005.1	20678.6
Bradi1g08930.1	0.0317719	0.573472	1.74377	11582.8	25010.1	17279.3	23920.4	19448.1	12654.7	9964.53	11247.1	10745.4	11153
Bradi3g41090.1	0.0322158	0.65707	1.52191	22032.5	14958.2	15385.3	12789	16291.2	8916.55	9042.38	12717.3	12141.7	10704.5
Bradi3g41480.1	0.0322699	0.304671	3.28223	1692.33	7470.2	6509.25	7684.85	5839.16	2069.6	1933.43	1277.44	1835.61	1779.02
Bradi1g38025.1	0.0327254	0.627433	1.5938	21599.3	24124.8	28465.3	17104.7	22823.5	14172.4	18455.2	9666.96	14986.4	14320.2
Bradi1g24960.1	0.0331928	0.436293	2.29204	38722.8	18797	13373.7	17940.2	22208.4	6641.83	7060.53	14200.4	10854.7	9689.38
Bradi1g04950.2	0.0332433	0.508873	1.96513	253816	138194	104493	107779	151071	82898.6	63311.1	93813.6	67479.9	76875.8
Bradi5g24530.1	0.0358864	0.581473	1.71977	55894.6	30644.2	35537.9	25098.7	36793.8	16758.2	22592.5	23682.3	22545.5	21394.6
Bradi4g40150.1	0.0370682	0.446228	2.24101	8513.62	4951.6	3659.98	6913.44	6009.66	3537.96	2672.59	3335.74	1180.41	2681.68
Bradi3g10500.1	0.0372473	0.13384	7.47161	61161.3	33310.9	5710.39	7164.64	26836.8	4543.81	3973.09	2996.64	2853.83	3591.84
Bradi1g52220.1	0.0377915	0.341017	2.93241	34919.5	10152.8	19791.2	12261	19281.1	2896.32	10058.7	9116.4	4229.3	6575.19
Bradi3g40560.1	0.0380517	0.226499	4.41504	69468	14735.5	18473.6	9336.76	28003.5	6207.67	6628.75	4206.81	8327.75	6342.74
Bradi3g49250.2	0.0382909	0.262732	3.80615	31408.8	20041.5	10008.6	6778.95	17059.4	1327.1	4624.36	5181.52	6795.3	4482.07
Bradi1g05740.1	0.0384963	0.304191	3.28741	29157.4	8538.45	35767.6	13883.1	21836.6	11340	7148	2938.2	5143.76	6642.5
Bradi2g60150.2	0.0399903	0.0125938	79.4044	8746.04	1093.49	3189.23	152842	41467.7	491.542	239.841	821.31	536.245	522.235
Bradi2g58370.5	0.0403922	0.126001	7.93642	2706.75	2412.25	1279.24	174.495	1643.18	266.367	165.2	138.825	257.78	207.043
Bradi2g54890.1	0.0407767	0.471577	2.12055	24712.5	11812.4	10499.2	9194.65	14054.7	8510.21	4098.33	7121.43	6781.5	6627.86
Bradi4g19470.1	0.041476	0.493493	2.02637	102464	57553.8	36721.8	40157.6	59224.3	30961.6	24048.5	29356.2	32540.7	29226.7
Bradi2g34650.1	0.0431835	0.345435	2.8949	3.12962e+06	1.29845e+06	715418	809450	1.48823e+06	413175	436337	567482	639357	514088
Bradi3g13800.1	0.0444646	0.361129	2.7691	115043	54882.9	23112.7	47864.3	60225.8	27103.2	19673.1	16436	23784.9	21749.3
Bradi1g20880.1	0.0448479	0.615597	1.62444	74408.3	43858.1	32603.4	49074	49986	33287.2	29144.6	28377	32276	30771.2
Bradi2g33450.1	0.0452529	0.518985	1.92684	87322.9	63774.5	30079.5	47709.2	57221.5	33670.7	31011.5	27201.1	26905	29697.1
Bradi1g17970.1	0.046331	0.510682	1.95817	36313.4	23690.7	13093.3	17647.7	22686.3	13770.2	8467.76	10301.8	13802.1	11585.5
Bradi3g39420.1	0.0469214	0.407076	2.45655	93593.4	29400.3	29512.4	27275.7	44945.5	18662.6	16010.7	20784.5	17727.1	18296.2
Bradi3g49230.1	0.0469354	0.638862	1.56528	538808	418924	258491	363961	395046	254922	203966	277383	273249	252380
Bradi3g28820.1	0.0490916	0.649009	1.54081	1.6189e+06	861060	813825	961108	1.06372e+06	743442	645001	682296	690727	690367

## Sheet: p<0.05,>1.5 fold upregulated
			NA					CA 2 days
Bradi no.	Anova (p)	Fold Change	Experiment 1	Experiment 2	Experiment 3	Experiment 4	Average	Experiment 1	Experiment 2	Experiment 3	Experiment 4	Average
Bradi5g20890.1	1.45e-05	2.96648	576543	427075	512914	462573	494776	1.29303e+06	1.68742e+06	1.40703e+06	1.4835e+06	1.46774e+06
Bradi5g02890.1	3.74e-05	2.25687	70581.3	65760	68023.2	55457.5	64955.5	133067	154682	133848	164786	146596
Bradi1g29900.1	0.000180322	6.07014	11391.9	11450.8	12536	21582.9	14240.4	84536.6	53304.1	96830.5	111094	86441.4
Bradi2g34910.1	0.000291865	1.57737	687514	718864	822697	750590	744916	1.08861e+06	1.25601e+06	1.28384e+06	1.07156e+06	1.17501e+06
Bradi5g07080.1	0.000320585	1.97733	112507	100771	141042	116008	117582	269377	205048	240482	215087	232498
Bradi1g01936.1	0.00109326	1.72907	96283.5	73635.7	77621.1	69813.5	79338.4	115317	148282	151141	133988	137182
Bradi1g26310.1	0.00127885	1.52741	898243	756867	759471	846153	815184	1.26419e+06	1.11003e+06	1.14924e+06	1.45701e+06	1.24512e+06
Bradi3g48590.1	0.00129305	2.22952	133307	134601	210296	107637	146460	326861	306501	308196	364583	326535
Bradi2g04070.1	0.00192002	3.92139	79823	48285.4	24944.9	33692.2	46686.4	145643	167866	247620	171172	183075
Bradi5g19680.1	0.00202371	3.31904	3433.81	2094.19	2347.24	3274.6	2787.46	6982.34	11546.8	5826.24	12651.4	9251.69
Bradi5g16320.1	0.00207249	2.08072	22515.5	28449	32412.8	16999.1	25094.1	56201.5	51296.6	47121	54235.9	52213.8
Bradi3g50230.1	0.00239021	2.47291	24379	15934.3	17193	13216.2	17680.6	45492.5	52469.1	29475.2	47453.3	43722.5
Bradi1g32310.1	0.00351092	2.64222	37719.6	22888.3	20067.6	19627.2	25075.7	68327.7	42218.1	72346.7	82129.3	66255.5
Bradi2g08100.1	0.0039652	4.13982	1160.99	3380.67	775.164	2392.31	1927.28	6593.2	7241.8	8210.38	9869.08	7978.61
Bradi2g55070.1	0.00696074	2.5461	66582.4	45131.2	59417.3	26090.6	49305.4	104805	124130	172027	101184	125536
Bradi1g73190.1	0.0069882	4.90527	1541.93	7233.9	4089.61	11944.4	6202.46	35557.8	21652.7	34523.7	29964.6	30424.7
Bradi1g25517.1	0.00768867	25.0638	0	408.325	0	0	102.081	5388.35	1795.58	1412.29	1637.97	2558.55
Bradi2g43150.1	0.00770233	1.99468	80386.8	124659	99222.2	102898	101792	215600	229897	127926	238742	203041
Bradi5g15550.1	0.00888872	6.29862	29294	3994.12	26656.7	9643.98	17397.2	151445	156839	66767.6	63262.1	109578
Bradi2g62010.1	0.00902979	1.66605	20170.4	23549.3	34908.9	28314.8	26735.9	48181.5	35917.6	48836.1	45238.3	44543.4
Bradi3g05010.1	0.00911279	2.48036	82429.9	56219.9	36066.7	42521.9	54309.6	81576.2	136784	146196	174272	134707
Bradi1g50270.1	0.00993609	1.59771	91276.1	91711.9	63947.3	67894.4	78707.4	147858	131611	99189.5	124350	125752
Bradi2g10960.1	0.0115594	1.83911	12907.1	7161.89	9392.3	6297.38	8939.67	13420.3	15323.9	17696.1	19323.8	16441
Bradi1g24240.1	0.011653	1.62836	30212.7	49700.7	39276.1	53705.5	43223.8	59809.3	71465.5	78588.5	71672.6	70384
Bradi2g12790.2	0.0116643	2.23506	78060.8	78204.5	28112.2	53180.9	59389.6	116300	133471	136973	144213	132739
Bradi1g56720.1	0.011764	1.576	43847.1	74621.2	51534.2	54637.2	56159.9	107528	84839.9	79833.9	81831.5	88508.3
Bradi5g11980.1	0.0120247	1.84365	22137	20600	37049	27174.4	26740.1	38232.9	46788.6	66084.1	46092.4	49299.5
Bradi1g47140.1	0.0136995	3.07636	6149.13	2456.78	1536.42	2166.63	3077.24	7817.7	7868.25	6649.75	15531.1	9466.7
Bradi5g00925.1	0.0148535	23.5746	0	0	53.9085	251.797	76.4265	1268.25	2330.36	1861.18	1747.1	1801.72
Bradi2g03400.2	0.0157705	3.30167	2207.4	3313.12	843.495	3987.31	2587.83	10907.2	4889.01	10001.9	8378.61	8544.17
Bradi1g03720.1	0.0182017	1.93422	140890	89579.4	61786.1	51701.4	85989.1	145190	161259	178004	180836	166322
Bradi1g52680.1	0.0183317	1.50396	99092	70208.4	68408.2	56295.6	73501	94820.4	117724	105325	124300	110542
Bradi1g25860.1	0.0195374	3.46956	914.819	8684.44	4019.65	4066.64	4421.39	13518.3	16598.6	13444.8	17799.4	15340.3
Bradi1g56580.1	0.0213156	1.96998	5286.38	4571.34	11746.7	6253.15	6964.4	16494	9972.17	15415.7	12997.2	13719.8
Bradi2g11250.1	0.0224447	5.36668	43.0995	394.528	208.486	25762.2	6602.07	33697.4	38029.1	34269.4	35728.7	35431.2
Bradi1g70700.1	0.0236663	3.42133	93838.6	9156.16	25530.7	8388.87	34228.6	110580	117304	146768	93776.9	117107
Bradi3g12250.3	0.025377	1.56235	117530	68054.1	86030.4	69538.1	85288.2	129966	141205	103527	158303	133250
Bradi1g61790.1	0.0255416	2.19391	9841.08	9163.54	18280.9	10284.4	11892.5	15452.3	29837.1	38908.3	20166.3	26091
Bradi5g21140.1	0.0327875	1.6425	18930.9	8906.26	16291.1	11234.8	13840.8	18660.9	26254.9	20398.7	25619.4	22733.4
Bradi5g14490.1	0.0334609	2.47066	2421.28	13641.9	5858.63	9257.82	7794.91	14354.6	18573.4	24773.2	19333.2	19258.6
Bradi3g36520.1	0.0426496	2.24795	34304	30708.6	13153.1	56822.6	33747.1	66419.8	84628.8	47449.5	104949	75861.8
Bradi4g17020.1	0.0435697	1.6689	23353.8	21703.7	41554.3	16790.8	25850.7	31522	50274.6	47545.5	43226.8	43142.2
Bradi1g24860.3	0.0442442	19.5292	0	195.337	236.942	875.241	326.88	7647.38	1522.2	6861.82	9503.46	6383.72
Bradi1g66590.1	0.0488162	1.57983	401813	273890	304899	249600	307550	341014	431120	482964	688408	485877
